# Supplementary material for: A biodegradable covalent organic framework for synergistic tumor therapy
Source: Royal Society of Chemistry journal article supplement (doi:10.1039/d2sc05732h), 2023-01-01
Supplement: d2sc05732h1.pdf [file d2sc05732h1.pdf]

## A biodegradable covalent organic framework for synergistic tumor therapy

Wen-Yan Li, Jing-Jing Wan, Jing-Lan Kan, Bo Wang, Tian Song, Qun Guan, Le-Le Zhou, Yan-An Li and Yu-Bin Dong\*

College of Chemistry, Chemical Engineering and Materials Science, Collaborative Innovation Center of Functionalized Probes for Chemical Imaging in Universities of Shandong, Key Laboratory of Molecular and Nano Probes, Ministry of Education, Shandong Normal University, Jinan 250014, P. R. China. Email: yubindong@sdu.edu.cn

|                                                                                 |    |
|---------------------------------------------------------------------------------|----|
| 1. Experimental Materials .....                                                 | 2  |
| 2. Cell Culture and Experimental Animals.....                                   | 2  |
| 3. Experimental Instrumentations.....                                           | 3  |
| 4. Statistical Analysis .....                                                   | 4  |
| 5. Synthesis of DSPP-COF .....                                                  | 4  |
| 6. Model Reaction .....                                                         | 18 |
| 7. Synthesis of nano DSPP-COF .....                                             | 19 |
| 8. Determination of sulfhydryl groups on nano DSPP-COF by Ellman's method ..... | 20 |
| 9. Drug loading experiments .....                                               | 21 |
| 10. Drug Release Experiments .....                                              | 22 |
| 11. ESR-Trapping Test.....                                                      | 23 |
| 12. Photodynamic Property .....                                                 | 23 |
| 13. Cell Uptake and Subcellular Localization .....                              | 24 |
| 14. Cellular Uptake Mechanism .....                                             | 24 |
| 15. Intracellular GSH Measurements .....                                        | 25 |
| 16. CCK-8 Cell Viability Assays .....                                           | 25 |
| 17. Calcein-AM/PI Double Staining .....                                         | 26 |
| 18. Intracellular Total ROS Measurements .....                                  | 26 |
| 19. Cell Death Rescue Experiments .....                                         | 26 |
| 20. Intracellular GPX4 Activity Measurements .....                              | 27 |
| 21. Intracellular Lipid Peroxidation Assays .....                               | 28 |
| 22. Mitochondrial Membrane Potential Measurements .....                         | 29 |
| 23. Lysosomal Membrane Permeabilization Detections .....                        | 29 |
| 24. Hemolysis Analysis .....                                                    | 30 |
| 25. In Vivo Biodistribution.....                                                | 31 |
| 26. In Vivo Antitumor Therapy.....                                              | 32 |
| 27. Supplemental References .....                                               | 33 |

## 1. Experimental Materials

5,10,15,20-tetrakis(4-formylphenyl)porphyrin and Bodipy-CHO were purchased from Jilin Chinese Academy of Sciences - Yanshen Technology Co., Ltd.

4,4'-disulfaneyldiphenylamine was purchased from Aladdin Reagent (Shanghai) Co., Ltd.

Glutathione (GSH) was purchased from Shanghai Macklin Biochemical Co., Ltd.

5,5',6,6'-tetrachloro-1,1',3,3'-tetraethylbenzimidazolylcarbocyanine iodide (JC-1), 2',7'-dichlorodihydrofluorescein diacetate (DCFH-DA), and 5,5'-Dithiobis-(2-nitrobenzoic acid) (DTNB) were purchased from MedChemExpress (Shanghai, P. R. China).

MitoTracker Deep Red FM, BODIPY581/591 undecanoic acid (C<sub>11</sub>-BODIPY), and Trypan Blue were purchased from Invitrogen (Thermo Fisher Scientific Inc.).

Acridine Orange (AO), and Giemsa staining solution were purchased from Beijing Solarbio Science & Technology Co., Ltd.

Glutathione peroxidase assay kit, Bradford protein assay kit were purchased from Beyotime (Shanghai, P. R. China).

GSH assay kit was purchased from Nanjing Jiancheng Bioengineering Institute (P. R. China).

3-methyladenine (3-MA) was purchased from TCI (Shanghai) Development Co., Ltd.

Glutathione ethyl ester (GSH-OEt) was purchased from Sigma-Aldrich.

CCK-8 assay kit was purchased from Dojindo (Shanghai, P.R. China).

Ferostatin-1, liproxstatin-1, and necrostatin-1 were purchased from MedChemExpress (Shanghai, P. R. China).

Paraformaldehyde (4 vol%) fix solution was purchased from Biosharp (Hefei, P. R. China).

Hematoxylin-eosin (H&E) staining kit, terminal deoxynucleotidyl transferase-mediated dUTP nick-end labeling (TUNEL) immunofluorescence assay kit, and Ki67 immunohistochemistry staining kit were purchased from Wuhan Servicebio Technology Co., Ltd.

Trypsin (0.25 wt%) and EDTA (0.02 wt%) in Puck's saline A (trypsin/EDTA solution), Phosphate-buffered saline (PBS), and Dulbecco's phosphate-buffered saline (DPBS) were purchased from Biological Industries USA, Inc.

Certified fetal bovine serum (FBS) was purchased from VivaCell (Shanghai, P. R. China).

Hank's balanced salt solution (HBSS), GlutaMAX (100×), and soybean trypsin inhibitor powder were purchased from Gibco (Thermo Fisher Scientific Inc.).

Dulbecco's modified eagle medium (DMEM) was purchased from HyClone Laboratories, Inc.

Normocin was purchased from Invivogen (San Diego, CA, USA).

Mammary epithelial cell growth medium (MEGM) BulletKit was purchased from Lonza Walkersville, Inc.

Normal saline (NS) was purchased from Shandong Qidu Pharmaceutical Co. Ltd.

## 2. Cell Culture and Experimental Animals

MCF-7 (human breast adenocarcinoma) cell lines were provided by Institute of Basic Medicine, Shandong Academy of Medical Sciences (Jinan, P. R. China). MCF-10A (human mammary epithelia) cell line was provided by Stem Cell Bank, Chinese Academy of Sciences (Shanghai, P. R. China).

MCF-7 cells were cultured in DMEM supplemented with FBS (10 vol%), human recombinant insulin (10 µg/mL) and Normocin (100 µg/mL) in a 5 vol% CO<sub>2</sub> atmosphere at 37 °C. MCF-10A cells were cultured using MEGM BulletKit supplemented with Normocin (100 µg/mL) in a 5 vol% CO<sub>2</sub> atmosphere at 37 °C. When necessary, trypsin/EDTA solution was used to dissociate cells, and

FBS-containing culture media, or soybean trypsin inhibitor (2.0 mg/mL) was used to discontinue the dissociation.

All animal procedures were reviewed and approved by the Ethics Committee of Shandong Normal University (Jinan, P. R. China), approval number AEECDNU2022050. All the animal experiments complied with relevant guidelines of the Chinese government and regulations for the care and use of experimental animals. Nude mice (BALB/cJGpt-Foxn1nu/Gpt, aged 4 weeks) were purchased from Hangzhou Ziyuan Laboratory Animal Technology Co., Ltd. The nude mice were housed in a pathogen-free facility and kept in a temperature-controlled room set to light and dark cycle of 12 h each. To establish the MCF-7 xenograft model, MCF-7 cells ( $10^7$  cells) suspended in HBSS (40  $\mu$ L) were subcutaneously injected into the flanks of each mouse. The length (L) and width (W) of the tumor were determined using digital calipers. The tumor volume (V) was calculated by the formula:  $V = 1/2 \times L \times W^2$ .

### 3. Experimental Instrumentations

Fourier transform infrared (FT-IR) spectra were obtained in the 4000–400  $\text{cm}^{-1}$  range using a Thermo Scientific Nicolet iS50 FT-IR Spectrometer equipped with a diamond attenuated total reflection (ATR) module. Each spectrum was an average of 16 scans.

Ultraviolet-visible (UV-vis) absorption spectra were recorded on a Shimadzu UV-2700 Double Beam UV-vis Spectrophotometer using 10 mm quartz cuvettes.

Ultraviolet-visible absorption spectra were recorded on a Shimadzu UV-2700 Double Beam UV-Vis Spectrophotometer.

Electron paramagnetic resonance (EPR) spectra were recorded on a Bruker A300 EPR Spectroscopy.

Liquid chromatography-tandem mass spectrometry (LC-MS/MS) analyses were carried out on SCIEX ExionLC AD and QTRAP 6500+ LCMS/MS Systems.

Powder X-ray diffraction (PXRD) patterns were obtained on a Rigaku SmartLab SE X-Ray Powder Diffractometer with Cu  $K\alpha$  line focused radiation ( $\lambda = 1.5405 \text{ \AA}$ ) from  $2\theta = 2.00^\circ$  up to  $30.00^\circ$  with  $0.01^\circ$  increment.

Nitrogen-adsorption isotherms were measured at 77 K with a Micromeritics ASAP2020 HD88 Surface Area and Porosity Analyser. Before measurement, the samples were degassed in vacuum at  $120^\circ\text{C}$  for 8 h. The Brunauer-Emmett-Teller (BET) equation was used to calculate the specific surface areas. The pore size distribution was derived from the sorption curve using the non-local density functional theory (NLDFT) model.

Transmission electron microscopy (TEM) images were recorded on a Hitachi HT7700 120 kV Compact-Digital Transmission Electron Microscope. High-angle annular dark field scanning transmission electron microscopy (HAADF-STEM) images and elemental mapping images were recorded using an FEI Talos F200X High-Resolution Scanning Transmission Electron Microscope. To prepare the TEM samples, the nanomaterial was dispersed in methanol by sonication for 5 min and the dispersion was placed on a carbon-coated copper TEM grid (300 mesh) and dried at room temperature.

Hydrodynamic particle size and Zeta potential were measured using Malvern Zetasizer Nano ZS90 System.

Microplate assays were carried out on a Molecular Devices SpectraMax i3x Multi-Mode Microplate Detection System.

Cell counting was performed on a Thermo Fisher Scientific Invitrogen Countess II Automated Cell

Counter equipped with Countess Cell Counting Chamber Slides.

Photomicrographs of biological samples were taken with a Leica DMI3000 B Inverted Fluorescence Microscope with an objective lens (10×, 20×, and 40×).

Laser scanning confocal fluorescence images of cells were captured with a Leica TCS SP8 Confocal Laser Scanning Microscopy equipped with 405, 458, 488, 514, 561, and 633 nm lasers. Glass bottom dishes and 4/8-well chamber slides (Cellvis, Mountain View, CA, USA) were used for cell culture to provide biological replicates of each experiment. Before live cell imaging, the original culture media or DPBS was replaced with HBSS supplemented with HEPES (15 mM) and GlutaMAX to provide better-buffering capacity under normal CO<sub>2</sub> concentration.

For imaging, the scan speed was 400 Hz and transmitted light was used to find the areas of interest to reduce photodamage to the biosample.

#### 4. Statistical Analysis

All results are depicted as means ± SD of at least three biological replicates, as indicated in figure legends. And data were compared with the paired or unpaired two-tailed Student's t-test with or without Welch's correction, two-way ANOVA followed by Šidák's post hoc test, as appropriate. ns, no significance ( $p > 0.05$ ), \* $p < 0.05$ , \*\* $p < 0.01$ .

#### 5. Synthesis of DSPP-COF

A mixture of 5,10,15,20-tetrakis(4-formylphenyl)porphyrin (TFPP) (18.12 mg, 0.025 mmol), 4-(2-(4-aminophenyl)disulfanyl)benzenamine (APDSBA) (12.42 mg, 0.05 mmol) in 1.0 mL *o*-dichlorobenzene and 1.0 mL *n*-BuOH was sonicated for 10 min, followed by slow addition of 0.25 mL of 6 M aqueous acetic acid. Afterward, the tube was flash-frozen at 77 K and degassed by three freeze-pump-thaw cycles, sealed under a vacuum, and heated at 120 °C for 3 days. After cooling down to room temperature, the resulting precipitate was filtered out, thoroughly washed with *o*-dichlorobenzene, ethanol, and acetone until the filtrate was colorless, and Soxhlet extractions with trichloromethane and dichloromethane for 24 h, respectively. After dried in vacuum at 70 °C overnight, **DSPP-COF** was obtained as a modena crystalline solid (22.68 mg, 78.9%).

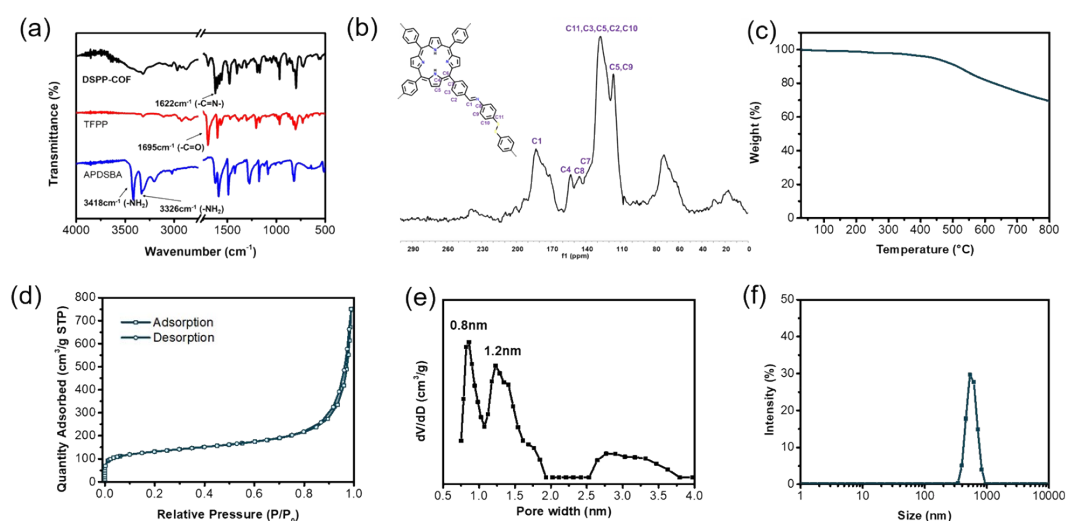

**Fig. S1** (a) IR spectra of **DSPP-COF** and its monomers. The peaks at 3416 and 3326 cm<sup>-1</sup> (for -NH<sub>2</sub>) in APDSBA, and 1695 cm<sup>-1</sup> (for -CHO) in TFPP basically disappeared, and the peaks at 1622 cm<sup>-1</sup> (for -C=N-) appeared. (b) <sup>13</sup>C CP-MAS solid-state NMR spectrum of **DSPP-COF**. C<sub>1</sub> is the carbon atom for the imine bond (183 ppm), and the carbon atoms in both monomers [DFPP (C<sub>2</sub>-

C<sub>7</sub>), APDSBA (C<sub>8</sub>-C<sub>11</sub>)] are represented in **DSPP-COF**. (c) TGA trace of **DSPP-COF**. (d) N<sub>2</sub> adsorption and desorption isotherms of **DSPP-COF**. BET Surface Area of **DSPP-COF** = 477.5 m<sup>2</sup>/g. (e) Pore size distributions of **DSPP-COF**. The pore size distribution curve based on nonlocal density functional theory (NLDFT) analysis, the pore width of **DSPP-COF** was centered at 0.8 and 1.2 nm. (f) Intensity (%) vs size distribution of **DSPP-COF**.

**Table S1** Fractional Atomic Coordinates for the Unit Cell of **DSPP-COF**

**DSPP-COF** AA-stacking mode and AB-stacking mode

|                                                                                                                                                                                                                                                                                                                                                                           |         |         |         |                                                                                                                                                                                                                                                                                                                  |         |         |          |
|---------------------------------------------------------------------------------------------------------------------------------------------------------------------------------------------------------------------------------------------------------------------------------------------------------------------------------------------------------------------------|---------|---------|---------|------------------------------------------------------------------------------------------------------------------------------------------------------------------------------------------------------------------------------------------------------------------------------------------------------------------|---------|---------|----------|
| 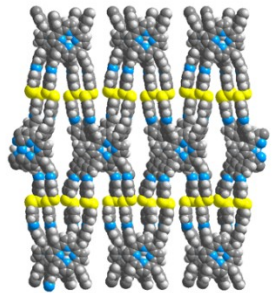 <p>AA-stacking mode<br/>Space group: <i>P1</i><br/><math>a = 20.8379 \text{ \AA}</math>, <math>b = 58.5083 \text{ \AA}</math>, <math>c = 3.4124 \text{ \AA}</math><br/><math>\alpha = 90.0521^\circ</math>, <math>\beta = 90.4837^\circ</math>, <math>\gamma = 89.6981^\circ</math></p> |         |         |         |  <p>AB-stacking mode<br/>Space group: <i>PMN21</i><br/><math>a = 20.9757 \text{ \AA}</math>, <math>b = 58.1098 \text{ \AA}</math>, <math>c = 6.4633 \text{ \AA}</math><br/><math>\alpha = \beta = \gamma = 90^\circ</math></p> |         |         |          |
|                                                                                                                                                                                                                                                                                                                                                                           | x       | y       | z       |                                                                                                                                                                                                                                                                                                                  | x       | y       | z        |
| C1                                                                                                                                                                                                                                                                                                                                                                        | 0.03151 | 0.08175 | 0.18434 | C1                                                                                                                                                                                                                                                                                                               | 0.47363 | 0.07962 | 0.19202  |
| C2                                                                                                                                                                                                                                                                                                                                                                        | 0.05274 | 0.05991 | 0.22667 | C2                                                                                                                                                                                                                                                                                                               | 0.41837 | 0.05706 | -0.02335 |
| C3                                                                                                                                                                                                                                                                                                                                                                        | 0.11496 | 0.05483 | 0.27591 | C3                                                                                                                                                                                                                                                                                                               | 0.37569 | 0.05023 | -0.1801  |
| C4                                                                                                                                                                                                                                                                                                                                                                        | 0.2053  | 0.02534 | 0.28639 | C4                                                                                                                                                                                                                                                                                                               | 0.34424 | 0.06896 | -0.28593 |
| C5                                                                                                                                                                                                                                                                                                                                                                        | 0.13888 | 0.0323  | 0.28792 | C5                                                                                                                                                                                                                                                                                                               | 0.38288 | 0.08652 | -0.37627 |
| N6                                                                                                                                                                                                                                                                                                                                                                        | 0.10271 | 0.01305 | 0.26731 | C6                                                                                                                                                                                                                                                                                                               | 0.35648 | 0.10721 | -0.42774 |
| C7                                                                                                                                                                                                                                                                                                                                                                        | 0.05754 | 0.96361 | 0.19507 | C7                                                                                                                                                                                                                                                                                                               | 0.29083 | 0.11087 | -0.39015 |
| C8                                                                                                                                                                                                                                                                                                                                                                        | 0.11972 | 0.97198 | 0.22066 | C8                                                                                                                                                                                                                                                                                                               | 0.25113 | 0.0926  | -0.31579 |
| C9                                                                                                                                                                                                                                                                                                                                                                        | 0.16935 | 0.95578 | 0.22095 | C9                                                                                                                                                                                                                                                                                                               | 0.2776  | 0.0717  | -0.26528 |
| C10                                                                                                                                                                                                                                                                                                                                                                       | 0.19096 | 0.94409 | 0.10586 | C10                                                                                                                                                                                                                                                                                                              | 0.26643 | 0.1341  | -0.42276 |
| C11                                                                                                                                                                                                                                                                                                                                                                       | 0.23014 | 0.92531 | 0.11763 | N11                                                                                                                                                                                                                                                                                                              | 0.20661 | 0.13909 | -0.3826  |
| C12                                                                                                                                                                                                                                                                                                                                                                       | 0.2524  | 0.91755 | 0.23932 | C12                                                                                                                                                                                                                                                                                                              | 0.18009 | 0.16154 | -0.40133 |
| C13                                                                                                                                                                                                                                                                                                                                                                       | 0.23782 | 0.93029 | 0.35082 | C13                                                                                                                                                                                                                                                                                                              | 0.21854 | 0.18207 | -0.4026  |
| C14                                                                                                                                                                                                                                                                                                                                                                       | 0.19832 | 0.94889 | 0.34319 | C14                                                                                                                                                                                                                                                                                                              | 0.19069 | 0.20352 | -0.41749 |
| C15                                                                                                                                                                                                                                                                                                                                                                       | 0.29054 | 0.89587 | 0.25118 | C15                                                                                                                                                                                                                                                                                                              | 0.12401 | 0.20498 | -0.43142 |
| S16                                                                                                                                                                                                                                                                                                                                                                       | 0.31168 | 0.78088 | 0.32671 | C16                                                                                                                                                                                                                                                                                                              | 0.08569 | 0.18463 | -0.43053 |
| C17                                                                                                                                                                                                                                                                                                                                                                       | 0.44798 | 0.44657 | 0.33957 | C17                                                                                                                                                                                                                                                                                                              | 0.11338 | 0.16314 | -0.41304 |
| C18                                                                                                                                                                                                                                                                                                                                                                       | 0.43117 | 0.47145 | 0.33574 | S18                                                                                                                                                                                                                                                                                                              | 0.08744 | 0.23252 | -0.47013 |
| C19                                                                                                                                                                                                                                                                                                                                                                       | 0.52813 | 0.58988 | 0.28705 | C19                                                                                                                                                                                                                                                                                                              | 0.03636 | 0.57049 | 0.18222  |
| C20                                                                                                                                                                                                                                                                                                                                                                       | 0.43745 | 0.56828 | 0.28989 | C20                                                                                                                                                                                                                                                                                                              | 0.04067 | 0.54851 | 0.09227  |
| C21                                                                                                                                                                                                                                                                                                                                                                       | 0.37175 | 0.56185 | 0.28312 | C21                                                                                                                                                                                                                                                                                                              | 0.03159 | 0.45111 | 0.04225  |
| C22                                                                                                                                                                                                                                                                                                                                                                       | 0.32747 | 0.57978 | 0.26062 | C22                                                                                                                                                                                                                                                                                                              | 0.0768  | 0.45815 | -0.11402 |
| C23                                                                                                                                                                                                                                                                                                                                                                       | 0.31298 | 0.59672 | 0.35852 | C23                                                                                                                                                                                                                                                                                                              | 0.11007 | 0.43925 | -0.23225 |

|     |         |         |         |     |         |         |          |
|-----|---------|---------|---------|-----|---------|---------|----------|
| C24 | 0.29789 | 0.61889 | 0.32373 | C24 | 0.16878 | 0.43185 | -0.16537 |
| C25 | 0.2907  | 0.62552 | 0.19226 | C25 | 0.18721 | 0.40914 | -0.20943 |
| C26 | 0.29837 | 0.60843 | 0.09712 | C26 | 0.14734 | 0.39356 | -0.321   |
| C27 | 0.31382 | 0.58618 | 0.12743 | C27 | 0.09225 | 0.4018  | -0.40712 |
| C28 | 0.27748 | 0.64899 | 0.15252 | C28 | 0.07377 | 0.42445 | -0.36204 |
| N29 | 0.2702  | 0.66433 | 0.24251 | C29 | 0.15884 | 0.36851 | -0.31761 |
| C30 | 0.26179 | 0.68819 | 0.24295 | N30 | 0.11856 | 0.35314 | -0.39487 |
| C31 | 0.26402 | 0.70212 | 0.13142 | C31 | 0.12031 | 0.32887 | -0.35736 |
| C32 | 0.2543  | 0.72558 | 0.14107 | C32 | 0.13484 | 0.32128 | -0.16224 |
| C33 | 0.24379 | 0.73631 | 0.26171 | C33 | 0.13545 | 0.29775 | -0.12592 |
| C34 | 0.24416 | 0.72243 | 0.37294 | C34 | 0.12294 | 0.28123 | -0.28328 |
| C35 | 0.25149 | 0.69899 | 0.36306 | C35 | 0.10577 | 0.28869 | -0.4769  |
| S36 | 0.22498 | 0.76654 | 0.27479 | C36 | 0.10338 | 0.31242 | -0.51199 |
| C37 | 0.14021 | 0.99446 | 0.25156 | S37 | 0.13766 | 0.25132 | -0.22692 |
| C38 | 0.15457 | 0.07357 | 0.30699 | C38 | 0.33739 | 0.01881 | -0.42364 |
| C39 | 0.14582 | 0.08553 | 0.42986 | C39 | 0.3665  | 0.02683 | -0.24525 |
| C40 | 0.17316 | 0.1063  | 0.45355 | C40 | 0.35066 | 0.94959 | 0.04362  |
| C41 | 0.21304 | 0.11739 | 0.36347 | C41 | 0.28395 | 0.94588 | 0.04216  |
| C42 | 0.22846 | 0.10482 | 0.25126 | C42 | 0.25776 | 0.92439 | -0.02296 |
| C43 | 0.20117 | 0.08394 | 0.22145 | C43 | 0.29754 | 0.90622 | -0.08802 |
| C44 | 0.23573 | 0.14038 | 0.39415 | C44 | 0.3643  | 0.9104  | -0.0988  |
| N45 | 0.24837 | 0.15465 | 0.30102 | C45 | 0.39052 | 0.93191 | -0.03473 |
| C46 | 0.25743 | 0.17879 | 0.30951 | C46 | 0.2686  | 0.88295 | -0.13431 |
| C47 | 0.24729 | 0.19143 | 0.42399 | N47 | 0.30344 | 0.86469 | -0.14145 |
| C48 | 0.25746 | 0.21483 | 0.43049 | C48 | 0.28164 | 0.84086 | -0.16654 |
| C49 | 0.27707 | 0.22746 | 0.32184 | C49 | 0.21633 | 0.83388 | -0.17409 |
| C50 | 0.28612 | 0.2151  | 0.20582 | C50 | 0.19842 | 0.8104  | -0.19443 |
| C51 | 0.27634 | 0.19163 | 0.20075 | C51 | 0.24468 | 0.79336 | -0.20646 |
| S52 | 0.29649 | 0.25791 | 0.33401 | C52 | 0.30987 | 0.80035 | -0.19801 |
| C53 | 0.28213 | 0.53266 | 0.26287 | C53 | 0.32783 | 0.82383 | -0.17761 |
| C54 | 0.28174 | 0.50935 | 0.27608 | S54 | 0.21647 | 0.76327 | -0.24955 |
| C55 | 0.34617 | 0.50226 | 0.30129 | C55 | 0.12797 | 0.48881 | -0.32944 |
| N56 | 0.3878  | 0.52073 | 0.30469 | C56 | 0.13132 | 0.51264 | -0.31423 |
| C57 | 0.34681 | 0.53962 | 0.28108 | C57 | 0.09522 | 0.51914 | -0.13825 |
| C58 | 0.36719 | 0.47943 | 0.32316 | N58 | 0.07104 | 0.50003 | -0.04521 |
| C59 | 0.31882 | 0.46233 | 0.31616 | C59 | 0.09019 | 0.48146 | -0.16181 |
| C60 | 0.30972 | 0.44613 | 0.41953 | C60 | 0.08748 | 0.54214 | -0.06265 |
| C61 | 0.29197 | 0.42387 | 0.39287 | C61 | 0.12944 | 0.56104 | -0.14948 |
| C62 | 0.27765 | 0.41652 | 0.26498 | C62 | 0.18948 | 0.56625 | -0.06606 |
| C63 | 0.27898 | 0.43299 | 0.16553 | C63 | 0.2219  | 0.58729 | -0.10601 |
| C64 | 0.29641 | 0.45528 | 0.18925 | C64 | 0.19512 | 0.60346 | -0.22983 |
| C65 | 0.26339 | 0.39301 | 0.22975 | C65 | 0.13701 | 0.59749 | -0.32536 |
| N66 | 0.26273 | 0.37738 | 0.31917 | C66 | 0.1044  | 0.57649 | -0.28439 |

|      |         |         |         |      |         |         |          |
|------|---------|---------|---------|------|---------|---------|----------|
| C67  | 0.25358 | 0.3536  | 0.30334 | C67  | 0.22544 | 0.62703 | -0.23552 |
| C68  | 0.24275 | 0.34255 | 0.18334 | N68  | 0.21068 | 0.64461 | -0.34826 |
| C69  | 0.23292 | 0.31907 | 0.17622 | C69  | 0.23412 | 0.66929 | -0.3051  |
| C70  | 0.23307 | 0.30516 | 0.28795 | C70  | 0.22552 | 0.68607 | -0.45071 |
| C71  | 0.24538 | 0.31618 | 0.40689 | C71  | 0.2439  | 0.70925 | -0.40892 |
| C72  | 0.25502 | 0.33958 | 0.41424 | C72  | 0.27049 | 0.71592 | -0.21956 |
| S73  | 0.21276 | 0.27471 | 0.28031 | C73  | 0.27954 | 0.69911 | -0.07534 |
| C74  | 0.9808  | 0.93781 | 0.14567 | C74  | 0.26153 | 0.67599 | -0.11695 |
| C75  | 0.96749 | 0.07995 | 0.15592 | S75  | 0.30038 | 0.74528 | -0.16411 |
| C76  | 0.94985 | 0.05704 | 0.18259 | H76  | 0.43442 | 0.08481 | -0.39326 |
| C77  | 0.88446 | 0.04997 | 0.18955 | H77  | 0.38804 | 0.12081 | -0.48832 |
| C78  | 0.79783 | 0.01925 | 0.2126  | H78  | 0.2002  | 0.09484 | -0.28889 |
| C79  | 0.86141 | 0.02723 | 0.18353 | H79  | 0.24675 | 0.05837 | -0.19698 |
| N80  | 0.8972  | 0.0079  | 0.16356 | H80  | 0.30024 | 0.14704 | -0.48237 |
| C81  | 0.04396 | 0.93946 | 0.15864 | H81  | 0.26996 | 0.1818  | -0.38957 |
| N82  | 0.00232 | 0.97643 | 0.20528 | H82  | 0.22153 | 0.21891 | -0.42316 |
| C83  | 0.95437 | 0.96088 | 0.1726  | H83  | 0.03424 | 0.18543 | -0.44265 |
| C84  | 0.88833 | 0.9661  | 0.17595 | H84  | 0.08282 | 0.14764 | -0.41149 |
| C85  | 0.84465 | 0.94766 | 0.18955 | H85  | 0.06825 | 0.58533 | 0.15627  |
| C86  | 0.85318 | 0.93228 | 0.29742 | H86  | 0.19684 | 0.44278 | -0.06128 |
| C87  | 0.81284 | 0.91422 | 0.3153  | H87  | 0.23019 | 0.40326 | -0.14303 |
| C88  | 0.76202 | 0.90923 | 0.22925 | H88  | 0.06056 | 0.39027 | -0.49402 |
| C89  | 0.75002 | 0.92492 | 0.12804 | H89  | 0.02728 | 0.42962 | -0.40715 |
| C90  | 0.78928 | 0.9434  | 0.107   | H90  | 0.19859 | 0.36305 | -0.23084 |
| C91  | 0.72559 | 0.88832 | 0.24424 | H91  | 0.14513 | 0.33354 | -0.03691 |
| N92  | 0.74441 | 0.8741  | 0.33385 | H92  | 0.14683 | 0.29234 | 0.0256   |
| C93  | 0.74168 | 0.85006 | 0.33693 | H93  | 0.09621 | 0.27653 | -0.60305 |
| C94  | 0.72616 | 0.83659 | 0.22766 | H94  | 0.09066 | 0.31797 | -0.66198 |
| C95  | 0.72568 | 0.81293 | 0.23411 | H95  | 0.31866 | 0.02905 | -0.54156 |
| C96  | 0.73929 | 0.80152 | 0.35137 | H96  | 0.25228 | 0.95913 | 0.10195  |
| C97  | 0.75594 | 0.81499 | 0.46032 | H97  | 0.20633 | 0.92163 | -0.0127  |
| C98  | 0.75747 | 0.83867 | 0.45314 | H98  | 0.39632 | 0.89687 | -0.15094 |
| S99  | 0.73122 | 0.7707  | 0.36083 | H99  | 0.44227 | 0.93439 | -0.03595 |
| C100 | 0.51192 | 0.44522 | 0.33841 | H100 | 0.21718 | 0.88144 | -0.14833 |
| C101 | 0.53473 | 0.46911 | 0.32698 | H101 | 0.17867 | 0.84622 | -0.16413 |
| C102 | 0.46238 | 0.59124 | 0.28507 | H102 | 0.14799 | 0.80546 | -0.20214 |
| C103 | 0.54554 | 0.56624 | 0.29154 | H103 | 0.34754 | 0.78805 | -0.21225 |
| C104 | 0.60891 | 0.55777 | 0.28846 | H104 | 0.37827 | 0.82881 | -0.17151 |
| C105 | 0.6596  | 0.57429 | 0.283   | H105 | 0.15107 | 0.47812 | -0.44927 |
| C106 | 0.69583 | 0.5819  | 0.39602 | H106 | 0.15731 | 0.52389 | -0.42052 |
| C107 | 0.72368 | 0.60328 | 0.40194 | H107 | 0.20921 | 0.55473 | 0.04066  |
| C108 | 0.72342 | 0.6187  | 0.29613 | H108 | 0.26664 | 0.59143 | -0.03208 |
| C109 | 0.69515 | 0.6104  | 0.18064 | H109 | 0.11494 | 0.60958 | -0.4214  |

|      |         |         |         |      |          |         |          |
|------|---------|---------|---------|------|----------|---------|----------|
| C110 | 0.66694 | 0.58913 | 0.17178 | H110 | 0.05763  | 0.57294 | -0.34719 |
| C111 | 0.75117 | 0.64161 | 0.31135 | H111 | 0.20369  | 0.63454 | -0.361   |
| N112 | 0.74676 | 0.65747 | 0.22082 | H112 | 0.20489  | 0.68114 | -0.59703 |
| C113 | 0.7658  | 0.68107 | 0.22918 | H113 | 0.2385   | 0.72182 | -0.52541 |
| C114 | 0.76139 | 0.6959  | 0.12136 | H114 | 0.29994  | 0.704   | 0.07099  |
| C115 | 0.77621 | 0.71893 | 0.13202 | H115 | 0.26798  | 0.66345 | -0.00098 |
| C116 | 0.79516 | 0.72852 | 0.25194 | C116 | 0.98028  | 0.43959 | 0.12388  |
| C117 | 0.80229 | 0.71358 | 0.35811 | H117 | 0.96346  | 0.42457 | 0.2069   |
| C118 | 0.78898 | 0.69047 | 0.34664 | H118 | 0.38894  | 0.09277 | 0.05739  |
| S119 | 0.81267 | 0.75877 | 0.26984 | C119 | 0.42333  | 0.94616 | 0.41729  |
| C120 | 0.86248 | 0.98848 | 0.17996 | C120 | 0.42156  | 0.96644 | 0.31199  |
| C121 | 0.83949 | 0.06829 | 0.20759 | C121 | 0.37942  | 0.97032 | 0.15353  |
| C122 | 0.84281 | 0.08256 | 0.32197 | C122 | 0.33841  | 0.99868 | -0.0853  |
| C123 | 0.81708 | 0.10427 | 0.32579 | C123 | 0.36818  | 0.99292 | 0.09183  |
| C124 | 0.78374 | 0.11414 | 0.21963 | N124 | 0.38414  | 1.01242 | 0.20212  |
| C125 | 0.77171 | 0.09907 | 0.11466 | H125 | 0.39008  | 0.93144 | 0.40837  |
| C126 | 0.79647 | 0.07712 | 0.1087  | H126 | 0.32025  | 0.98699 | -0.20495 |
| C127 | 0.76145 | 0.13799 | 0.21043 | H127 | 0.40166  | 1.01324 | 0.35033  |
| N128 | 0.77313 | 0.15329 | 0.30116 | H128 | 0.54527  | 0.51114 | 0.77354  |
| C129 | 0.76092 | 0.17741 | 0.2936  | C129 | 0.06716  | 0.06378 | 0.6642   |
| C130 | 0.75779 | 0.19117 | 0.40627 | C130 | 0.07014  | 0.04346 | 0.54519  |
| C131 | 0.74491 | 0.2145  | 0.4009  | C131 | 0.11364  | 0.03962 | 0.37562  |
| C132 | 0.73518 | 0.22597 | 0.28193 | C132 | 0.15596  | 0.01177 | 0.10547  |
| C133 | 0.73927 | 0.21244 | 0.16951 | C133 | 0.12545  | 0.01709 | 0.29457  |
| C134 | 0.75183 | 0.18913 | 0.17499 | N134 | -0.11005 | 0.00252 | 0.39526  |
| S135 | 0.71273 | 0.25636 | 0.27201 | H135 | 0.09956  | 0.07871 | 0.65644  |
| C136 | 0.6885  | 0.52635 | 0.27401 | H136 | 0.17367  | 0.02364 | -0.01027 |
| C137 | 0.68588 | 0.50313 | 0.26302 | H137 | -0.09218 | 0.00327 | 0.54752  |
| C138 | 0.62037 | 0.49707 | 0.2731  | H138 | 0.10763  | 0.91729 | 0.88338  |
| N139 | 0.57959 | 0.51634 | 0.285   | C139 | 0.07726  | 0.95284 | 0.83426  |
| C140 | 0.62463 | 0.53437 | 0.28308 | C140 | 0.11981  | 0.95959 | 0.66999  |
| C141 | 0.59837 | 0.4745  | 0.29323 | C141 | 0.14916  | 0.94065 | 0.53985  |
| C142 | 0.64436 | 0.45645 | 0.28741 | C142 | 0.10815  | 0.9245  | 0.44031  |
| C143 | 0.66706 | 0.44515 | 0.4043  | C143 | 0.13085  | 0.90342 | 0.36302  |
| C144 | 0.69688 | 0.42422 | 0.39999 | C144 | 0.19498  | 0.89781 | 0.38548  |
| C145 | 0.70836 | 0.4126  | 0.28258 | C145 | 0.23744  | 0.91461 | 0.47143  |
| C146 | 0.69047 | 0.42401 | 0.16651 | C146 | 0.21473  | 0.93604 | 0.54641  |
| C147 | 0.66162 | 0.4452  | 0.16715 | C147 | 0.21387  | 0.87397 | 0.32717  |
| C148 | 0.73774 | 0.39001 | 0.29291 | N148 | 0.2686   | 0.86578 | 0.37425  |
| N149 | 0.73462 | 0.37555 | 0.19642 | C149 | 0.28499  | 0.84184 | 0.343    |
| C150 | 0.75045 | 0.3519  | 0.20051 | C150 | 0.23736  | 0.82403 | 0.33094  |
| C151 | 0.75085 | 0.33915 | 0.31658 | C151 | 0.25403  | 0.80095 | 0.31876  |
| C152 | 0.76448 | 0.31589 | 0.31948 | C152 | 0.31823  | 0.79484 | 0.31997  |



|      |         |         |          |      |         |         |          |
|------|---------|---------|----------|------|---------|---------|----------|
| C153 | 0.77486 | 0.30334 | 0.20517  | C153 | 0.3664  | 0.8124  | 0.3296   |
| C154 | 0.77232 | 0.31579 | 0.08784  | C154 | 0.34971 | 0.83575 | 0.34123  |
| C155 | 0.76094 | 0.33927 | 0.08584  | S155 | 0.33253 | 0.76422 | 0.34054  |
| S156 | 0.79555 | 0.27279 | 0.21235  | C156 | 0.46918 | 0.44009 | 0.60297  |
| N157 | 0.48536 | 0.48479 | 0.33438  | C157 | 0.46515 | 0.46203 | 0.52809  |
| N158 | 0.48961 | 0.55409 | 0.293    | C158 | 0.53373 | 0.5824  | 0.73845  |
| N159 | 1.0037  | 0.04401 | 0.21868  | C159 | 0.47535 | 0.55935 | 0.53769  |
| H160 | 0.06066 | 0.09708 | 0.18094  | C160 | 0.43021 | 0.55227 | 0.38905  |
| H161 | 0.24761 | 0.0363  | 0.2914   | C161 | 0.4008  | 0.5713  | 0.28259  |
| H162 | 0.17525 | 0.95    | 0.00904  | C162 | 0.34496 | 0.58125 | 0.36932  |
| H163 | 0.24486 | 0.91619 | 0.02938  | C163 | 0.3331  | 0.60445 | 0.33646  |
| H164 | 0.25588 | 0.92436 | 0.44645  | C164 | 0.37685 | 0.61798 | 0.21734  |
| H165 | 0.18521 | 0.9579  | 0.43237  | C165 | 0.42877 | 0.60721 | 0.11272  |
| H166 | 0.41186 | 0.43331 | 0.33885  | C166 | 0.4405  | 0.58408 | 0.14575  |
| H167 | 0.56134 | 0.60423 | 0.28546  | C167 | 0.37207 | 0.64345 | 0.22579  |
| H168 | 0.32466 | 0.59303 | 0.46103  | N168 | 0.41592 | 0.65672 | 0.13677  |
| H169 | 0.29476 | 0.63199 | 0.40086  | C169 | 0.41936 | 0.68153 | 0.15892  |
| H170 | 0.29299 | 0.61284 | -0.00623 | C170 | 0.39956 | 0.6932  | 0.34394  |
| H171 | 0.32717 | 0.57424 | 0.04904  | C171 | 0.40391 | 0.71734 | 0.3611   |
| H172 | 0.27205 | 0.69436 | 0.03578  | C172 | 0.42734 | 0.73026 | 0.19324  |
| H173 | 0.25347 | 0.73597 | 0.05216  | C173 | 0.45007 | 0.71859 | 0.01283  |
| H174 | 0.23723 | 0.73004 | 0.46961  | C174 | 0.44637 | 0.69441 | -0.00386 |
| H175 | 0.24941 | 0.68861 | 0.45202  | S175 | 0.42895 | 0.7618  | 0.20456  |
| H176 | 0.11417 | 0.07782 | 0.50295  | C176 | 0.15773 | 0.99038 | 0.43241  |
| H177 | 0.16293 | 0.11484 | 0.54623  | C177 | 0.1284  | 0.98288 | 0.61473  |
| H178 | 0.26374 | 0.1112  | 0.18199  | C178 | 0.14536 | 0.06025 | 0.27855  |
| H179 | 0.21327 | 0.07542 | 0.12943  | C179 | 0.21236 | 0.06299 | 0.26899  |
| H180 | 0.2331  | 0.18269 | 0.51343  | C180 | 0.24165 | 0.08405 | 0.21379  |
| H181 | 0.25008 | 0.22306 | 0.52568  | C181 | 0.2048  | 0.10278 | 0.16581  |
| H182 | 0.30272 | 0.22424 | 0.11853  | C182 | 0.13773 | 0.09964 | 0.16384  |
| H183 | 0.28673 | 0.18237 | 0.11022  | C183 | 0.10835 | 0.07853 | 0.21884  |
| H184 | 0.24014 | 0.54369 | 0.2453   | C184 | 0.23729 | 0.12542 | 0.12544  |
| H185 | 0.24011 | 0.498   | 0.26846  | N185 | 0.20486 | 0.1442  | 0.12351  |
| H186 | 0.32835 | 0.45    | 0.51768  | C186 | 0.23026 | 0.16752 | 0.10116  |
| H187 | 0.29213 | 0.41143 | 0.47323  | C187 | 0.29622 | 0.17301 | 0.0675   |
| H188 | 0.26822 | 0.42805 | 0.06414  | C188 | 0.31774 | 0.19606 | 0.04999  |
| H189 | 0.30539 | 0.46691 | 0.10719  | C189 | 0.27456 | 0.21407 | 0.06932  |
| H190 | 0.24224 | 0.35255 | 0.09312  | C190 | 0.20885 | 0.20862 | 0.10136  |
| H191 | 0.22142 | 0.31148 | 0.08138  | C191 | 0.18707 | 0.18556 | 0.11556  |
| H192 | 0.24665 | 0.30656 | 0.49839  | S192 | 0.30523 | 0.24354 | 0.02826  |
| H193 | 0.26404 | 0.34746 | 0.50959  | C193 | 0.37924 | 0.52155 | 0.16669  |
| H194 | 0.94976 | 0.92388 | 0.11825  | C194 | 0.37573 | 0.49772 | 0.16706  |
| H195 | 0.93514 | 0.09371 | 0.12628  | C195 | 0.41092 | 0.49127 | 0.33076  |

|      |         |         |          |      |         |         |          |
|------|---------|---------|----------|------|---------|---------|----------|
| H196 | 0.75656 | 0.02961 | 0.2405   | N196 | 0.43452 | 0.5104  | 0.43135  |
| H197 | 0.08213 | 0.92697 | 0.14788  | C197 | 0.41619 | 0.52895 | 0.33076  |
| H198 | 0.89326 | 0.93491 | 0.36604  | C198 | 0.4189  | 0.46827 | 0.38816  |
| H199 | 0.8233  | 0.9029  | 0.39761  | C199 | 0.37872 | 0.44912 | 0.29537  |
| H200 | 0.70962 | 0.92198 | 0.06059  | C200 | 0.31784 | 0.44359 | 0.38471  |
| H201 | 0.77877 | 0.95469 | 0.02399  | C201 | 0.28803 | 0.42197 | 0.34225  |
| H202 | 0.71563 | 0.84474 | 0.1335   | C202 | 0.31833 | 0.40556 | 0.21035  |
| H203 | 0.71382 | 0.80338 | 0.14494  | C203 | 0.37695 | 0.41189 | 0.10766  |
| H204 | 0.76649 | 0.80704 | 0.55548  | C204 | 0.40688 | 0.43345 | 0.15075  |
| H205 | 0.7707  | 0.84888 | 0.5396   | C205 | 0.29155 | 0.38144 | 0.204    |
| H206 | 0.54469 | 0.43077 | 0.33761  | N206 | 0.30939 | 0.36381 | 0.07989  |
| H207 | 0.4355  | 0.60724 | 0.27731  | C207 | 0.29222 | 0.33875 | 0.12107  |
| H208 | 0.69407 | 0.5717  | 0.48561  | C208 | 0.30049 | 0.32194 | -0.03815 |
| H209 | 0.74564 | 0.60869 | 0.49527  | C209 | 0.28734 | 0.2985  | -0.0019  |
| H210 | 0.69351 | 0.62168 | 0.09499  | C210 | 0.26677 | 0.29148 | 0.19628  |
| H211 | 0.64134 | 0.58458 | 0.08173  | C211 | 0.25886 | 0.30837 | 0.35519  |
| H212 | 0.74662 | 0.68933 | 0.02534  | C212 | 0.27114 | 0.33179 | 0.31846  |
| H213 | 0.7718  | 0.72953 | 0.04388  | S213 | 0.24244 | 0.2616  | 0.25177  |
| H214 | 0.81572 | 0.72027 | 0.45445  | H214 | 0.05732 | 0.92759 | 0.4359   |
| H215 | 0.79757 | 0.67979 | 0.43315  | H215 | 0.09719 | 0.89093 | 0.29553  |
| H216 | 0.87105 | 0.07593 | 0.40471  | H216 | 0.28743 | 0.91088 | 0.48648  |
| H217 | 0.8233  | 0.1142  | 0.4159   | H217 | 0.24732 | 0.94833 | 0.62134  |
| H218 | 0.74255 | 0.10431 | 0.02986  | H218 | 0.17879 | 0.86297 | 0.24942  |
| H219 | 0.7876  | 0.06659 | 0.02172  | H219 | 0.18686 | 0.82765 | 0.34013  |
| H220 | 0.76368 | 0.18324 | 0.5028   | H220 | 0.21626 | 0.78764 | 0.31557  |
| H221 | 0.73969 | 0.22396 | 0.49299  | H221 | 0.41631 | 0.80823 | 0.3374   |
| H222 | 0.73071 | 0.22023 | 0.07363  | H222 | 0.38717 | 0.84908 | 0.35382  |
| H223 | 0.75458 | 0.17982 | 0.08217  | H223 | 0.43724 | 0.42526 | 0.576    |
| H224 | 0.73179 | 0.53687 | 0.2785   | H224 | 0.55124 | 0.59762 | 0.8228   |
| H225 | 0.72707 | 0.4915  | 0.25941  | H225 | 0.31451 | 0.57194 | 0.47982  |
| H226 | 0.65648 | 0.45294 | 0.49912  | H226 | 0.29234 | 0.61227 | 0.41665  |
| H227 | 0.71151 | 0.41647 | 0.49347  | H227 | 0.46323 | 0.6171  | 0.01925  |
| H228 | 0.69891 | 0.41593 | 0.07148  | H228 | 0.48496 | 0.57692 | 0.08624  |
| H229 | 0.6463  | 0.45298 | 0.07468  | H229 | 0.33303 | 0.651   | 0.31799  |
| H230 | 0.7394  | 0.34735 | 0.40966  | H230 | 0.38156 | 0.68371 | 0.47608  |
| H231 | 0.76716 | 0.30728 | 0.41461  | H231 | 0.38908 | 0.72587 | 0.50564  |
| H232 | 0.7813  | 0.30701 | -0.00487 | H232 | 0.46937 | 0.72825 | -0.11679 |
| H233 | 0.76048 | 0.34815 | -0.00829 | H233 | 0.46336 | 0.68572 | -0.14556 |
| H234 | 0.4873  | 0.5006  | 0.29733  | H234 | 0.17644 | 0.97989 | 0.30392  |
| H235 | 0.25638 | 0.38915 | 0.12576  | H235 | 0.24183 | 0.04927 | 0.31488  |
| H236 | 0.7577  | 0.38554 | 0.38953  | H236 | 0.29314 | 0.08601 | 0.21841  |
| H237 | 0.69144 | 0.88383 | 0.16593  | H237 | 0.10794 | 0.11362 | 0.12491  |
| H238 | 0.73754 | 0.14243 | 0.11789  | H238 | 0.05642 | 0.07678 | 0.22404  |

|      |          |         |         |      |         |         |          |
|------|----------|---------|---------|------|---------|---------|----------|
| H239 | 0.23419  | 0.14543 | 0.4975  | H239 | 0.28911 | 0.12607 | 0.11089  |
| H240 | 0.27623  | 0.65287 | 0.0477  | H240 | 0.33156 | 0.15984 | 0.05209  |
| N241 | 0.26377  | 0.88364 | 0.36359 | H241 | 0.36847 | 0.19988 | 0.02124  |
| H242 | 0.05513  | 0.0127  | 0.24935 | H242 | 0.17403 | 0.22201 | 0.11126  |
| C243 | 0.20602  | 0.0021  | 0.26224 | H243 | 0.13615 | 0.18171 | 0.13915  |
| C244 | -0.79851 | 0.00425 | 0.21206 | H244 | 0.35698 | 0.53221 | 0.05853  |
| H245 | 0.48627  | 0.53703 | 0.30037 | H245 | 0.35044 | 0.48644 | 0.05875  |
| H246 | 0.94402  | 0.00684 | 0.14412 | H246 | 0.29561 | 0.45528 | 0.49862  |
| C247 | -0.13122 | 0.07491 | 0.76503 | H247 | 0.24261 | 0.41762 | 0.42066  |
| C248 | -0.10658 | 0.05691 | 0.68821 | H248 | 0.40171 | 0.39964 | 0.0052   |
| C249 | -0.04229 | 0.05445 | 0.65011 | H249 | 0.45436 | 0.43723 | 0.08351  |
| C250 | 0.04971  | 0.02628 | 0.6123  | H250 | 0.31382 | 0.37397 | 0.06806  |
| C251 | -0.01623 | 0.03282 | 0.62206 | H251 | 0.31621 | 0.32708 | -0.1915  |
| N252 | -0.05045 | 0.01283 | 0.63372 | H252 | 0.29122 | 0.28617 | -0.13059 |
| C253 | -0.0928  | 0.96228 | 0.66016 | H253 | 0.243   | 0.30337 | 0.50866  |
| C254 | -0.02994 | 0.97135 | 0.66725 | H254 | 0.26514 | 0.34438 | 0.44475  |
| C255 | 0.01872  | 0.9544  | 0.67342 | C255 | 1.02676 | 0.94121 | 0.91794  |
| C256 | 0.05462  | 0.94743 | 0.56053 | H256 | 0.9663  | 0.51065 | 0.20161  |
| C257 | 0.08515  | 0.92651 | 0.5562  | C257 | 1.01771 | 0.07328 | 0.66004  |
| C258 | 0.08785  | 0.9115  | 0.66372 | C258 | 0.98891 | 0.05197 | 0.61172  |
| C259 | 0.05835  | 0.91921 | 0.77872 | C259 | 0.92521 | 0.04539 | 0.67088  |
| C260 | 0.02499  | 0.93956 | 0.78458 | C260 | 0.84102 | 0.01357 | 0.68354  |
| C261 | 0.11817  | 0.88904 | 0.65009 | C261 | 0.90418 | 0.02188 | 0.6691   |
| N262 | 0.12147  | 0.87484 | 0.74823 | N262 | 0.94391 | 0.00388 | 0.65391  |
| C263 | 0.12789  | 0.85059 | 0.74446 | H263 | 0.99923 | 0.0866  | 0.76567  |
| C264 | 0.14323  | 0.8378  | 0.85712 | H264 | 0.79817 | 0.02361 | 0.6967   |
| C265 | 0.14424  | 0.81406 | 0.8563  | H265 | 0.99386 | 0.00501 | 0.657    |
| C266 | 0.12938  | 0.80153 | 0.74295 | C266 | 0.07554 | 0.93126 | 0.91902  |
| C267 | 0.11718  | 0.81419 | 0.62922 | H267 | 0.04847 | 0.49965 | 0.10049  |
| C268 | 0.11721  | 0.83793 | 0.62965 | C268 | 0.99605 | 0.96183 | 0.90312  |
| S269 | 0.13122  | 0.77031 | 0.7415  | C269 | 0.93146 | 0.96541 | 0.97043  |
| C270 | 0.27734  | 0.44627 | 0.77449 | C270 | 0.88806 | 0.94426 | 0.98677  |
| C271 | 0.26533  | 0.47025 | 0.73173 | C271 | 0.89089 | 0.92739 | 0.82512  |
| C272 | 0.37886  | 0.58559 | 0.76623 | C272 | 0.86456 | 0.90529 | 0.85199  |
| C273 | 0.28693  | 0.56538 | 0.72857 | C273 | 0.82849 | 0.89997 | 1.03206  |
| C274 | 0.22151  | 0.55999 | 0.70376 | C274 | 0.82046 | 0.91728 | 1.18844  |
| C275 | 0.17573  | 0.57794 | 0.70423 | C275 | 0.85128 | 0.93918 | 1.16794  |
| C276 | 0.1475   | 0.58695 | 0.82229 | C276 | 0.80188 | 0.87607 | 1.05023  |
| C277 | 0.11391  | 0.60742 | 0.82286 | N277 | 0.74182 | 0.87182 | 1.10395  |
| C278 | 0.10048  | 0.62012 | 0.70881 | C278 | 0.71015 | 0.84921 | 1.0977   |
| C279 | 0.12156  | 0.61002 | 0.59229 | C279 | 0.74413 | 0.82861 | 1.09978  |
| C280 | 0.1573   | 0.59026 | 0.58719 | C280 | 0.71149 | 0.80706 | 1.09148  |
| C281 | 0.06739  | 0.64229 | 0.69627 | C281 | 0.64455 | 0.80557 | 1.07716  |

|      |          |         |         |      |         |         |         |
|------|----------|---------|---------|------|---------|---------|---------|
| N282 | 0.05799  | 0.65626 | 0.79417 | C282 | 0.61063 | 0.82598 | 1.07459 |
| C283 | 0.0479   | 0.68057 | 0.78353 | C283 | 0.643   | 0.84759 | 1.08829 |
| C284 | 0.05326  | 0.69301 | 0.66623 | S284 | 0.60272 | 0.77771 | 1.03464 |
| C285 | 0.05009  | 0.71679 | 0.66139 | C285 | 0.52265 | 0.4404  | 0.71784 |
| C286 | 0.04009  | 0.72976 | 0.77425 | C286 | 0.54965 | 0.46258 | 0.71197 |
| C287 | 0.03012  | 0.71753 | 0.89002 | C287 | 0.48291 | 0.58189 | 0.61398 |
| C288 | 0.03402  | 0.69383 | 0.89453 | C288 | 0.55596 | 0.56013 | 0.73748 |
| S289 | 0.03631  | 0.76095 | 0.7675  | C289 | 0.60985 | 0.55373 | 0.84617 |
| C290 | -0.01099 | 0.99433 | 0.64559 | C290 | 0.64484 | 0.57289 | 0.95901 |
| C291 | -0.00497 | 0.07502 | 0.65107 | C291 | 0.62802 | 0.57731 | 1.16861 |
| C292 | 0.05632  | 0.07834 | 0.71494 | C292 | 0.63474 | 0.5997  | 1.25587 |
| C293 | 0.08321  | 0.09985 | 0.7256  | C293 | 0.65706 | 0.61805 | 1.13379 |
| C294 | 0.05411  | 0.11977 | 0.67404 | C294 | 0.68068 | 0.61313 | 0.93102 |
| C295 | -0.00481 | 0.11652 | 0.61011 | C295 | 0.67586 | 0.59059 | 0.84563 |
| C296 | -0.03247 | 0.09543 | 0.59533 | C296 | 0.65088 | 0.64212 | 1.21554 |
| C297 | 0.08232  | 0.14262 | 0.68539 | N297 | 0.64414 | 0.65893 | 1.09106 |
| N298 | 0.06101  | 0.15934 | 0.61256 | C298 | 0.63422 | 0.68294 | 1.14696 |
| C299 | 0.0728   | 0.18304 | 0.62728 | C299 | 0.63518 | 0.69186 | 1.35195 |
| C300 | 0.0714   | 0.19347 | 0.7505  | C300 | 0.63149 | 0.71563 | 1.39412 |
| C301 | 0.08157  | 0.21669 | 0.76722 | C301 | 0.62728 | 0.73104 | 1.23445 |
| C302 | 0.09313  | 0.23112 | 0.66127 | C302 | 0.62246 | 0.7221  | 1.03115 |
| C303 | 0.09423  | 0.22084 | 0.53756 | C303 | 0.62554 | 0.69824 | 0.98875 |
| C304 | 0.08443  | 0.19751 | 0.52064 | S304 | 0.63914 | 0.76176 | 1.30115 |
| S305 | 0.1111   | 0.26134 | 0.68658 | C305 | 0.84281 | 0.99342 | 1.01274 |
| C306 | 0.13059  | 0.53226 | 0.66845 | C306 | 0.90706 | 0.98792 | 0.99213 |
| C307 | 0.12692  | 0.50919 | 0.64767 | C307 | 0.87961 | 0.06455 | 0.71045 |
| C308 | 0.19093  | 0.50075 | 0.65183 | C308 | 0.84788 | 0.06808 | 0.90397 |
| N309 | 0.23634  | 0.51853 | 0.66822 | C309 | 0.81651 | 0.08879 | 0.95109 |
| C310 | 0.19701  | 0.53787 | 0.68038 | C310 | 0.81829 | 0.10649 | 0.80805 |
| C311 | 0.20747  | 0.47756 | 0.67221 | C311 | 0.84736 | 0.10251 | 0.61172 |
| C312 | 0.15964  | 0.46061 | 0.64825 | C312 | 0.87661 | 0.0816  | 0.56226 |
| C313 | 0.12857  | 0.4488  | 0.75366 | C313 | 0.78776 | 0.12862 | 0.8624  |
| C314 | 0.10616  | 0.42678 | 0.73803 | N314 | 0.81149 | 0.14818 | 0.79667 |
| C315 | 0.10737  | 0.41521 | 0.61792 | C315 | 0.78181 | 0.17009 | 0.83665 |
| C316 | 0.13188  | 0.42738 | 0.51148 | C316 | 0.71468 | 0.17208 | 0.84139 |
| C317 | 0.15615  | 0.44915 | 0.52339 | C317 | 0.68743 | 0.19386 | 0.858   |
| C318 | 0.0861   | 0.3917  | 0.60029 | C318 | 0.72633 | 0.21403 | 0.87378 |
| N319 | 0.0726   | 0.37913 | 0.70106 | C319 | 0.79327 | 0.212   | 0.87392 |
| C320 | 0.06131  | 0.35524 | 0.70491 | C320 | 0.82065 | 0.19025 | 0.85185 |
| C321 | 0.06477  | 0.3412  | 0.59398 | S321 | 0.6889  | 0.24195 | 0.85676 |
| C322 | 0.05313  | 0.31789 | 0.59768 | C322 | 0.6885  | 0.52417 | 0.92134 |
| C323 | 0.03935  | 0.30686 | 0.71529 | C323 | 0.68847 | 0.5003  | 0.90597 |
| C324 | 0.03636  | 0.32071 | 0.82735 | C324 | 0.62925 | 0.4929  | 0.83353 |

|      |          |         |         |      |         |         |         |
|------|----------|---------|---------|------|---------|---------|---------|
| C325 | 0.0473   | 0.34411 | 0.82218 | N325 | 0.59359 | 0.51152 | 0.80576 |
| S326 | 0.0223   | 0.27626 | 0.71749 | C326 | 0.62964 | 0.53067 | 0.85552 |
| C327 | 0.82736  | 0.93781 | 0.61653 | C327 | 0.6083  | 0.46949 | 0.80301 |
| C328 | 0.80395  | 0.07413 | 0.75301 | C328 | 0.64942 | 0.4504  | 0.86097 |
| C329 | 0.79065  | 0.05528 | 0.66765 | C329 | 0.64733 | 0.44293 | 1.06489 |
| C330 | 0.72996  | 0.04968 | 0.61816 | C330 | 0.66761 | 0.42081 | 1.10697 |
| C331 | 0.6463   | 0.01939 | 0.67475 | C331 | 0.68897 | 0.40565 | 0.94611 |
| C332 | 0.70799  | 0.02732 | 0.62993 | C332 | 0.69551 | 0.4139  | 0.74424 |
| N333 | 0.74866  | 0.00842 | 0.64115 | C333 | 0.67659 | 0.43611 | 0.70297 |
| C334 | -0.10752 | 0.93914 | 0.62983 | C334 | 0.6994  | 0.3811  | 0.99184 |
| N335 | -0.14855 | 0.9754  | 0.66691 | N335 | 0.70163 | 0.363   | 0.85849 |
| C336 | 0.80209  | 0.9599  | 0.64021 | C336 | 0.70809 | 0.33804 | 0.91521 |
| C337 | 0.73715  | 0.96637 | 0.64369 | C337 | 0.70285 | 0.32059 | 0.76054 |
| C338 | 0.6916   | 0.94843 | 0.63399 | C338 | 0.7115  | 0.29742 | 0.80415 |
| C339 | 0.64332  | 0.94767 | 0.53198 | C339 | 0.72545 | 0.29135 | 1.00475 |
| C340 | 0.60776  | 0.92825 | 0.5093  | C340 | 0.72898 | 0.30879 | 1.16039 |
| C341 | 0.61335  | 0.90861 | 0.5882  | C341 | 0.72037 | 0.33196 | 1.11691 |
| C342 | 0.65717  | 0.91001 | 0.69304 | S342 | 0.7494  | 0.26236 | 1.06435 |
| C343 | 0.69471  | 0.92875 | 0.71722 | H343 | 0.91782 | 0.93081 | 0.68218 |
| C344 | 0.57625  | 0.88793 | 0.56131 | H344 | 0.87186 | 0.8923  | 0.72966 |
| N345 | 0.5849   | 0.86988 | 0.63373 | H345 | 0.79348 | 0.91348 | 1.3299  |
| C346 | 0.55999  | 0.84728 | 0.62709 | H346 | 0.84856 | 0.95173 | 1.29588 |
| C347 | 0.52946  | 0.8378  | 0.51662 | H347 | 0.83102 | 0.86236 | 0.984   |
| C348 | 0.50787  | 0.81535 | 0.51468 | H348 | 0.7957  | 0.82899 | 1.11076 |
| C349 | 0.51628  | 0.80076 | 0.62326 | H349 | 0.73874 | 0.79154 | 1.0911  |
| C350 | 0.5458   | 0.81047 | 0.73382 | H350 | 0.55907 | 0.82514 | 1.06022 |
| C351 | 0.56874  | 0.83258 | 0.73375 | H351 | 0.61584 | 0.86314 | 1.0853  |
| S352 | 0.48932  | 0.77082 | 0.63086 | H352 | 0.53969 | 0.42586 | 0.79713 |
| C353 | 0.33965  | 0.4449  | 0.80005 | H353 | 0.45493 | 0.59662 | 0.58308 |
| C354 | 0.36708  | 0.46774 | 0.77093 | H354 | 0.6034  | 0.56406 | 1.2584  |
| C355 | 0.31321  | 0.58762 | 0.75427 | H355 | 0.61719 | 0.60303 | 1.41352 |
| C356 | 0.39487  | 0.56182 | 0.74877 | H356 | 0.69935 | 0.6269  | 0.83503 |
| C357 | 0.45739  | 0.55216 | 0.74651 | H357 | 0.68871 | 0.58763 | 0.68327 |
| C358 | 0.50888  | 0.56745 | 0.76513 | H358 | 0.64685 | 0.64498 | 1.38114 |
| C359 | 0.52085  | 0.57725 | 0.89194 | H359 | 0.64121 | 0.68092 | 1.48004 |
| C360 | 0.54368  | 0.59922 | 0.90397 | H360 | 0.63503 | 0.72219 | 1.5519  |
| C361 | 0.55992  | 0.61245 | 0.79465 | H361 | 0.61955 | 0.73333 | 0.90333 |
| C362 | 0.55694  | 0.60171 | 0.67154 | H362 | 0.62384 | 0.69174 | 0.83039 |
| C363 | 0.53493  | 0.5797  | 0.65624 | H363 | 0.80154 | 0.98155 | 1.0149  |
| C364 | 0.57583  | 0.63646 | 0.81306 | H364 | 0.84994 | 0.05536 | 1.02126 |
| N365 | 0.57392  | 0.64981 | 0.71241 | H365 | 0.79331 | 0.09142 | 1.10258 |
| C366 | 0.56665  | 0.67389 | 0.70479 | H366 | 0.84767 | 0.1156  | 0.4969  |
| C367 | 0.53626  | 0.68338 | 0.59469 | H367 | 0.90031 | 0.07922 | 0.41124 |

|      |         |         |         |      |         |         |         |
|------|---------|---------|---------|------|---------|---------|---------|
| C368 | 0.53411 | 0.70684 | 0.57411 | H368 | 0.74607 | 0.12837 | 0.96431 |
| C369 | 0.56157 | 0.72231 | 0.66349 | H369 | 0.68346 | 0.15696 | 0.82034 |
| C370 | 0.58707 | 0.71282 | 0.77915 | H370 | 0.63585 | 0.19504 | 0.85211 |
| C371 | 0.59023 | 0.68929 | 0.79839 | H371 | 0.82476 | 0.22713 | 0.88298 |
| S372 | 0.57521 | 0.7527  | 0.62243 | H372 | 0.8724  | 0.1891  | 0.84436 |
| C373 | 0.71383 | 0.98894 | 0.65517 | H373 | 0.72765 | 0.53544 | 0.97256 |
| C374 | 0.69127 | 0.06951 | 0.57914 | H374 | 0.72746 | 0.48964 | 0.94483 |
| C375 | 0.72531 | 0.08939 | 0.53765 | H375 | 0.62556 | 0.45347 | 1.18866 |
| C376 | 0.69579 | 0.10958 | 0.50205 | H376 | 0.66239 | 0.41492 | 1.26347 |
| C377 | 0.62911 | 0.11231 | 0.50698 | H377 | 0.71218 | 0.40279 | 0.6166  |
| C378 | 0.59438 | 0.09232 | 0.53488 | H378 | 0.67808 | 0.44145 | 0.54447 |
| C379 | 0.62321 | 0.07195 | 0.56977 | H379 | 0.69985 | 0.37288 | 0.84336 |
| C380 | 0.6     | 0.13457 | 0.48162 | H380 | 0.69363 | 0.3251  | 0.60442 |
| N381 | 0.57931 | 0.1467  | 0.57978 | H381 | 0.71056 | 0.28461 | 0.67871 |
| C382 | 0.56353 | 0.17044 | 0.58601 | H382 | 0.73994 | 0.30445 | 1.31541 |
| C383 | 0.55347 | 0.1815  | 0.70562 | H383 | 0.72477 | 0.34509 | 1.23919 |
| C384 | 0.541   | 0.20481 | 0.7154  | H384 | 1.00962 | 0.92618 | 1.00063 |
| C385 | 0.53766 | 0.21893 | 0.60508 | C385 | 0.02557 | 0.4288  | 0.11162 |
| C386 | 0.54809 | 0.20806 | 0.4847  | H386 | 0.05466 | 0.41421 | 0.0668  |
| C387 | 0.56    | 0.18467 | 0.47578 | H387 | 0.49075 | 0.09454 | 0.28183 |
| S388 | 0.51447 | 0.24929 | 0.61696 | C388 | 0.42033 | 0.07864 | 0.07601 |
| C389 | 0.53705 | 0.51966 | 0.72673 | C389 | 0.50378 | 0.05886 | 0.15595 |
| C390 | 0.53119 | 0.49639 | 0.7215  | C390 | 0.56797 | 0.05505 | 0.20551 |
| C391 | 0.46432 | 0.49187 | 0.72481 | C391 | 0.61186 | 0.07604 | 0.22286 |
| N392 | 0.42726 | 0.51206 | 0.72329 | C392 | 0.61058 | 0.09247 | 0.06916 |
| C393 | 0.47404 | 0.52906 | 0.72897 | C393 | 0.63658 | 0.11464 | 0.10174 |
| C394 | 0.43353 | 0.47097 | 0.75145 | C394 | 0.67062 | 0.12047 | 0.27876 |
| C395 | 0.47348 | 0.45147 | 0.76009 | C395 | 0.67719 | 0.10359 | 0.42599 |
| C396 | 0.50651 | 0.44454 | 0.87805 | C396 | 0.6468  | 0.08159 | 0.40034 |
| C397 | 0.52888 | 0.4225  | 0.89298 | C397 | 0.69636 | 0.14448 | 0.30476 |
| C398 | 0.52399 | 0.40625 | 0.79175 | N398 | 0.75658 | 0.14897 | 0.34084 |
| C399 | 0.4938  | 0.41312 | 0.67506 | C399 | 0.7877  | 0.17166 | 0.33879 |
| C400 | 0.46921 | 0.4346  | 0.65873 | C400 | 0.75332 | 0.19216 | 0.36517 |
| C401 | 0.54729 | 0.38298 | 0.80614 | C401 | 0.7855  | 0.21379 | 0.36164 |
| N402 | 0.53846 | 0.3689  | 0.70941 | C402 | 0.85239 | 0.21547 | 0.32816 |
| C403 | 0.54927 | 0.3452  | 0.70176 | C403 | 0.88661 | 0.19515 | 0.29987 |
| C404 | 0.5551  | 0.33106 | 0.81157 | C404 | 0.85474 | 0.17346 | 0.30892 |
| C405 | 0.56714 | 0.30778 | 0.80097 | S405 | 0.89399 | 0.24343 | 0.29575 |
| C406 | 0.57403 | 0.29721 | 0.67833 | C406 | 0.98811 | 0.58143 | 0.18425 |
| C407 | 0.56663 | 0.31144 | 0.56844 | C407 | 0.96129 | 0.55922 | 0.17121 |
| C408 | 0.55396 | 0.33474 | 0.57924 | C408 | 0.95661 | 0.46169 | 0.13773 |
| S409 | 0.59794 | 0.26694 | 0.6625  | C409 | 0.90197 | 0.46805 | 0.26211 |
| N410 | 0.31974 | 0.4835  | 0.74221 | C410 | 0.86628 | 0.44887 | 0.3687  |

|      |          |         |         |      |         |         |         |
|------|----------|---------|---------|------|---------|---------|---------|
| N411 | 0.33816  | 0.55069 | 0.72985 | C411 | 0.88199 | 0.44418 | 0.57103 |
| N412 | 0.84506  | 0.04375 | 0.63456 | C412 | 0.87322 | 0.4218  | 0.64389 |
| H413 | -0.10268 | 0.08755 | 0.81679 | C413 | 0.84991 | 0.40372 | 0.51413 |
| H414 | 0.09056  | 0.03774 | 0.60535 | C414 | 0.82795 | 0.40895 | 0.31986 |
| H415 | 0.05105  | 0.95812 | 0.47284 | C415 | 0.83508 | 0.43146 | 0.24911 |
| H416 | 0.10676  | 0.92121 | 0.46317 | C416 | 0.8533  | 0.37955 | 0.57799 |
| H417 | 0.05737  | 0.90817 | 0.86518 | N417 | 0.85808 | 0.36263 | 0.44029 |
| H418 | -0.00274 | 0.94405 | 0.87111 | C418 | 0.86536 | 0.33847 | 0.47722 |
| H419 | 0.15482  | 0.84663 | 0.94893 | C419 | 0.86255 | 0.32952 | 0.67635 |
| H420 | 0.15636  | 0.80488 | 0.9466  | C420 | 0.86432 | 0.30569 | 0.70129 |
| H421 | 0.10697  | 0.80594 | 0.53519 | C421 | 0.86837 | 0.29026 | 0.52994 |
| H422 | 0.1067   | 0.8469  | 0.53751 | C422 | 0.87477 | 0.29918 | 0.33157 |
| H423 | 0.24005  | 0.43342 | 0.7818  | C423 | 0.87353 | 0.32309 | 0.30628 |
| H424 | 0.41244  | 0.59973 | 0.78382 | S424 | 0.8541  | 0.25962 | 0.57779 |
| H425 | 0.15875  | 0.57833 | 0.91518 | C425 | 0.65574 | 0.02675 | 0.20732 |
| H426 | 0.09778  | 0.61416 | 0.91709 | C426 | 0.5917  | 0.03247 | 0.20671 |
| H427 | 0.11081  | 0.6187  | 0.49957 | C427 | 0.61701 | 0.95571 | 0.54289 |
| H428 | 0.17428  | 0.58451 | 0.49128 | C428 | 0.65116 | 0.95253 | 0.72107 |
| H429 | 0.0622   | 0.68441 | 0.57339 | C429 | 0.68358 | 0.93199 | 0.74283 |
| H430 | 0.05622  | 0.72558 | 0.56751 | C430 | 0.68046 | 0.91411 | 0.59008 |
| H431 | 0.01981  | 0.72703 | 0.97991 | C431 | 0.64875 | 0.91769 | 0.40865 |
| H432 | 0.02554  | 0.68511 | 0.98747 | C432 | 0.61847 | 0.93843 | 0.38372 |
| H433 | 0.08227  | 0.06361 | 0.75763 | C433 | 0.71218 | 0.89216 | 0.618   |
| H434 | 0.13038  | 0.10098 | 0.77409 | N434 | 0.68724 | 0.87243 | 0.55383 |
| H435 | -0.03152 | 0.1312  | 0.5722  | C435 | 0.71705 | 0.85052 | 0.56867 |
| H436 | -0.07942 | 0.09476 | 0.54587 | C436 | 0.78414 | 0.84845 | 0.55048 |
| H437 | 0.06186  | 0.18308 | 0.83713 | C437 | 0.81119 | 0.82664 | 0.54485 |
| H438 | 0.08084  | 0.22387 | 0.86583 | C438 | 0.77215 | 0.80653 | 0.56016 |
| H439 | 0.10359  | 0.23157 | 0.45181 | C439 | 0.70529 | 0.80865 | 0.5824  |
| H440 | 0.08826  | 0.19006 | 0.42233 | C440 | 0.6781  | 0.83042 | 0.58316 |
| H441 | 0.08257  | 0.4991  | 0.6409  | S441 | 0.8093  | 0.77855 | 0.51514 |
| H442 | 0.13257  | 0.45561 | 0.85356 | C442 | 0.82235 | 0.49752 | 0.37329 |
| H443 | 0.08748  | 0.41816 | 0.82489 | C443 | 0.82224 | 0.52138 | 0.37401 |
| H444 | 0.13388  | 0.41945 | 0.41412 | C444 | 0.88177 | 0.52884 | 0.29298 |
| H445 | 0.18144  | 0.45619 | 0.43863 | N445 | 0.91779 | 0.51024 | 0.24451 |
| H446 | 0.07641  | 0.34876 | 0.49972 | C446 | 0.88166 | 0.49107 | 0.28985 |
| H447 | 0.05532  | 0.30804 | 0.50653 | C447 | 0.90264 | 0.55226 | 0.2735  |
| H448 | 0.02395  | 0.31317 | 0.92138 | C448 | 0.86116 | 0.57127 | 0.35569 |
| H449 | 0.04296  | 0.35438 | 0.91124 | C449 | 0.86257 | 0.57868 | 0.56445 |
| H450 | 0.79931  | 0.92258 | 0.59404 | C450 | 0.84059 | 0.60057 | 0.62796 |
| H451 | 0.76901  | 0.08568 | 0.79619 | C451 | 0.81811 | 0.61553 | 0.48386 |
| H452 | 0.60536  | 0.02983 | 0.70293 | C452 | 0.81264 | 0.60733 | 0.27754 |
| H453 | -0.07289 | 0.92527 | 0.61756 | C453 | 0.83335 | 0.58536 | 0.21508 |

|      |         |         |         |      |         |         |          |
|------|---------|---------|---------|------|---------|---------|----------|
| H454 | 0.64043 | 0.96216 | 0.46386 | C454 | 0.80528 | 0.63989 | 0.55052  |
| H455 | 0.57565 | 0.92803 | 0.42388 | N455 | 0.80068 | 0.65792 | 0.43092  |
| H456 | 0.66336 | 0.89554 | 0.75906 | C456 | 0.792   | 0.68275 | 0.50724  |
| H457 | 0.73057 | 0.92822 | 0.7966  | C457 | 0.79567 | 0.70023 | 0.36341  |
| H458 | 0.52382 | 0.84874 | 0.43032 | C458 | 0.78569 | 0.7233  | 0.42601  |
| H459 | 0.48347 | 0.80978 | 0.42463 | C459 | 0.77197 | 0.72923 | 0.63503  |
| H460 | 0.55023 | 0.80046 | 0.82456 | C460 | 0.76947 | 0.71176 | 0.77924  |
| H461 | 0.59257 | 0.83921 | 0.82206 | C461 | 0.7795  | 0.68869 | 0.71678  |
| H462 | 0.36926 | 0.43084 | 0.83348 | S462 | 0.74756 | 0.75812 | 0.72203  |
| H463 | 0.28642 | 0.6036  | 0.76169 | H463 | 0.58487 | 0.08866 | -0.07055 |
| H464 | 0.50052 | 0.56858 | 0.97731 | H464 | 0.63036 | 0.12732 | -0.01332 |
| H465 | 0.54407 | 0.60722 | 1.00101 | H465 | 0.70248 | 0.10781 | 0.56526  |
| H466 | 0.56729 | 0.6113  | 0.58179 | H466 | 0.64816 | 0.0694  | 0.52229  |
| H467 | 0.52594 | 0.57319 | 0.55729 | H467 | 0.66651 | 0.15803 | 0.25686  |
| H468 | 0.51613 | 0.67193 | 0.51931 | H468 | 0.7018  | 0.19165 | 0.39206  |
| H469 | 0.51354 | 0.7132  | 0.48251 | H469 | 0.7579  | 0.22922 | 0.3806   |
| H470 | 0.61082 | 0.72405 | 0.851   | H470 | 0.93802 | 0.19611 | 0.26907  |
| H471 | 0.61477 | 0.68267 | 0.88525 | H471 | 0.88218 | 0.15799 | 0.28662  |
| H472 | 0.77783 | 0.08862 | 0.53968 | H472 | 0.97085 | 0.59598 | 0.27768  |
| H473 | 0.72761 | 0.12357 | 0.47458 | H473 | 0.90701 | 0.45718 | 0.66467  |
| H474 | 0.54174 | 0.09266 | 0.5297  | H474 | 0.88978 | 0.41824 | 0.79515  |
| H475 | 0.59043 | 0.05803 | 0.59333 | H475 | 0.80862 | 0.39541 | 0.2184   |
| H476 | 0.55447 | 0.17137 | 0.79569 | H476 | 0.82315 | 0.43463 | 0.09192  |
| H477 | 0.53324 | 0.21165 | 0.81379 | H477 | 0.85704 | 0.37663 | 0.74051  |
| H478 | 0.5467  | 0.21837 | 0.39486 | H478 | 0.85659 | 0.34051 | 0.81343  |
| H479 | 0.5684  | 0.17715 | 0.37959 | H479 | 0.85954 | 0.29915 | 0.85543  |
| H480 | 0.57145 | 0.48418 | 0.726   | H480 | 0.8773  | 0.2879  | 0.19534  |
| H481 | 0.50733 | 0.45647 | 0.96066 | H481 | 0.87638 | 0.3296  | 0.15191  |
| H482 | 0.55051 | 0.41767 | 0.98732 | H482 | 0.6973  | 0.03849 | 0.20685  |
| H483 | 0.48693 | 0.4011  | 0.59401 | H483 | 0.65051 | 0.96544 | 0.84629  |
| H484 | 0.44121 | 0.43863 | 0.57101 | H484 | 0.7088  | 0.92965 | 0.88279  |
| H485 | 0.55007 | 0.33907 | 0.90744 | H485 | 0.64735 | 0.90444 | 0.28631  |
| H486 | 0.57288 | 0.29806 | 0.89217 | H486 | 0.59315 | 0.94056 | 0.24359  |
| H487 | 0.57116 | 0.30445 | 0.46983 | H487 | 0.75577 | 0.89271 | 0.69934  |
| H488 | 0.54944 | 0.34552 | 0.49146 | H488 | 0.81547 | 0.8635  | 0.52912  |
| H489 | 0.32704 | 0.49789 | 0.69122 | H489 | 0.86272 | 0.82539 | 0.52229  |
| H490 | 0.08667 | 0.38505 | 0.5     | H490 | 0.67366 | 0.79359 | 0.59184  |
| H491 | 0.56936 | 0.37815 | 0.90012 | H491 | 0.62638 | 0.83163 | 0.59302  |
| H492 | 0.54244 | 0.88832 | 0.4784  | H492 | 0.78306 | 0.48623 | 0.42614  |
| H493 | 0.60539 | 0.14111 | 0.38163 | H493 | 0.78293 | 0.53201 | 0.42898  |
| H494 | 0.11995 | 0.14491 | 0.76022 | H494 | 0.8848  | 0.56828 | 0.67496  |
| H495 | 0.57913 | 0.64289 | 0.91373 | H495 | 0.84513 | 0.60645 | 0.7874   |
| H496 | 0.05851 | 0.64778 | 0.59511 | H496 | 0.79531 | 0.61831 | 0.16235  |



|      |          |         |         |      |         |         |         |
|------|----------|---------|---------|------|---------|---------|---------|
| H497 | -0.0976  | 0.0122  | 0.65491 | H497 | 0.83233 | 0.58005 | 0.05319 |
| C498 | 0.05329  | 0.00294 | 0.62946 | H498 | 0.80336 | 0.64809 | 0.40823 |
| C499 | -0.64934 | 0.00403 | 0.68438 | H499 | 0.80499 | 0.69582 | 0.20148 |
| H500 | 0.33578  | 0.53391 | 0.71191 | H500 | 0.78569 | 0.73614 | 0.30957 |
| H501 | 0.79477  | 0.00749 | 0.61267 | H501 | 0.75848 | 0.71601 | 0.94048 |
| H502 | 1.0895   | 0.54401 | 0.67686 | H502 | 0.77617 | 0.67552 | 0.83097 |
| H503 | 0.58203  | 0.52918 | 0.73351 | C503 | 0.47817 | 0.9476  | 0.52656 |
| H504 | 0.77398  | 0.64485 | 0.4068  | C504 | 0.50794 | 0.96875 | 0.48465 |
| C505 | 0.27025  | 0.85922 | 0.35391 | C505 | 0.57185 | 0.97503 | 0.53069 |
| C506 | 0.27944  | 0.84595 | 0.4661  | C506 | 0.65688 | 1.00659 | 0.5429  |
| C507 | 0.29085  | 0.82256 | 0.45943 | C507 | 0.59351 | 0.99849 | 0.5394  |
| C508 | 0.2913   | 0.81101 | 0.33948 | N508 | 0.55432 | 1.01664 | 0.54644 |
| C509 | 0.27752  | 0.824   | 0.22785 | H509 | 0.49602 | 0.93418 | 0.61808 |
| C510 | 0.26773  | 0.84745 | 0.23482 | H510 | 0.69945 | 0.99641 | 0.53818 |
| H511 | 0.27932  | 0.85477 | 0.56081 | H511 | 0.50432 | 1.01574 | 0.56136 |
| H512 | 0.29967  | 0.81344 | 0.55116 | H512 | 0.45662 | 0.51084 | 0.57192 |
| H513 | 0.27643  | 0.81555 | 0.13243 | N513 | 0.46945 | 0.04491 | 0.02611 |
| H514 | 0.26077  | 0.85704 | 0.14428 | N514 | 0.47297 | 0.98039 | 0.35511 |
| H515 | 0.60913  | 0.98476 | 0.70563 | N515 | 1.02465 | 0.04047 | 0.46531 |
| H516 | 0.75824  | 0.98472 | 0.23681 | N516 | 1.03076 | 0.97596 | 0.77582 |
| H517 | 1.24877  | 0.99157 | 0.24857 | N517 | 0.99666 | 0.54597 | 0.03602 |
| H518 | 1.09679  | 0.9926  | 0.63256 | N518 | 0.99114 | 0.47559 | 0.00803 |
| H519 | 1.13074  | 0.88406 | 0.55023 | N519 | 0.51453 | 0.4758  | 0.59476 |

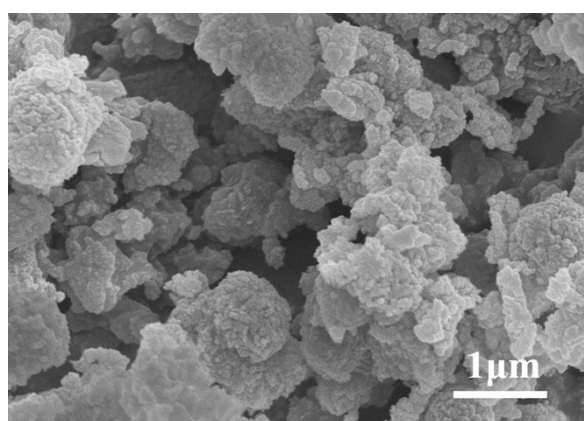

**Fig. S2** SEM image of **DSPP-COF**.

## 6. Model Reaction

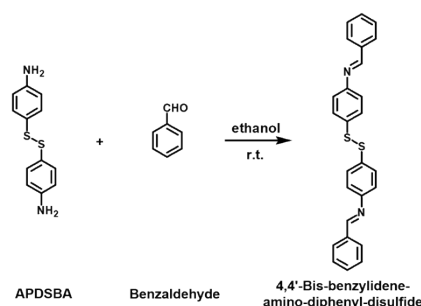

**Synthesis.** A mixture of APDSBA (425 mg, 1.0 mmol) and benzaldehyde (265 mg, 2.5 mmol) in ethanol (20 mL) was stirred for 4 h at room temperature. The resultant precipitates were filtered and washed with cold ethanol (three times) to afford model compound as off-white solids. After recrystallized in dichloromethane/methanol (20 mL, 3:1, V/V), 4,4'-bis-benzylidene-amino-diphenyl-disulfide was obtained as the gray needle-like crystals in 65% yield. IR (KBr pellet  $\text{cm}^{-1}$ ): 3062 (v), 2873 (v), 2850 (v), 1620 (s), 1570 (m), 1480 (m), 1450 (m), 1400 (v), 1360 (v), 1192 (m), 1168 (m), 1105 (v), 1073 (v), 1005 (v), 971 (v), 880 (m), 818 (s), 755 (s), 712 (v), 687 (s), 532 (m).  $^1\text{H NMR}$  (400 MHz, chloroform- $d$ )  $\delta$  = 8.42 (s, 2H), 7.93-7.81 (m, 4H), 7.57-7.50 (m, 4H), 7.47 (d,  $J$  = 1.4, 4H), 7.45 (s, 2H), 7.15 (d,  $J$  = 8.4, 4H). HRMS (ESI)  $m/z$   $[\text{M}+\text{H}]^+$  calcd for  $\text{C}_{26}\text{H}_{20}\text{N}_2\text{S}_2$  425.1101, found 425.1114.

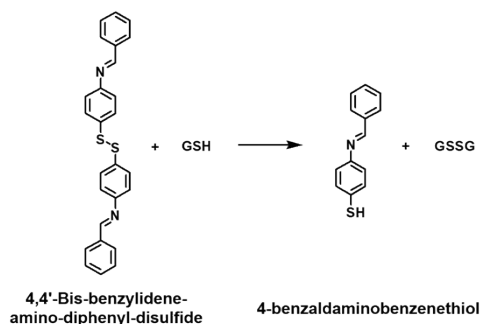

**Degradation.** A mixture of 10  $\mu\text{M}$  4,4'-bis-benzylidene-amino-diphenyl-disulfide and 10 mM GSH in PBS was stirred for 12 hours at 37  $^\circ\text{C}$  to afford degradation product in 93% yield. IR (KBr pellet  $\text{cm}^{-1}$ ): 3394 (m), 3030 (v), 2947 (v), 2925 (v), 1625 (m), 1588 (s), 1397 (v), 1360 (v), 1313 (m), 1285 (m), 1248 (v), 1178 (m), 1122 (m), 1094 (m), 1073 (v), 1028 (v), 973 (v), 881 (v), 815 (m), 758 (w), 732 (v), 694 (m), 536 (v), 519 (v).  $^1\text{H NMR}$  (400 MHz,  $\text{CDCl}_3$ )  $\delta$  = 8.45 (s, 1H), 7.93 (m, 2H), 7.50 (m, 2H), 7.48 (m, 1H), 7.33-7.31 (m, 2H), 7.17-7.15 (2H), 3.49 (s, 1H). HRMS (ESI)  $m/z$   $[\text{M}]^-$  calcd for  $\text{C}_{13}\text{H}_{10}\text{NS}^-$  212.0534, found 212.0533.

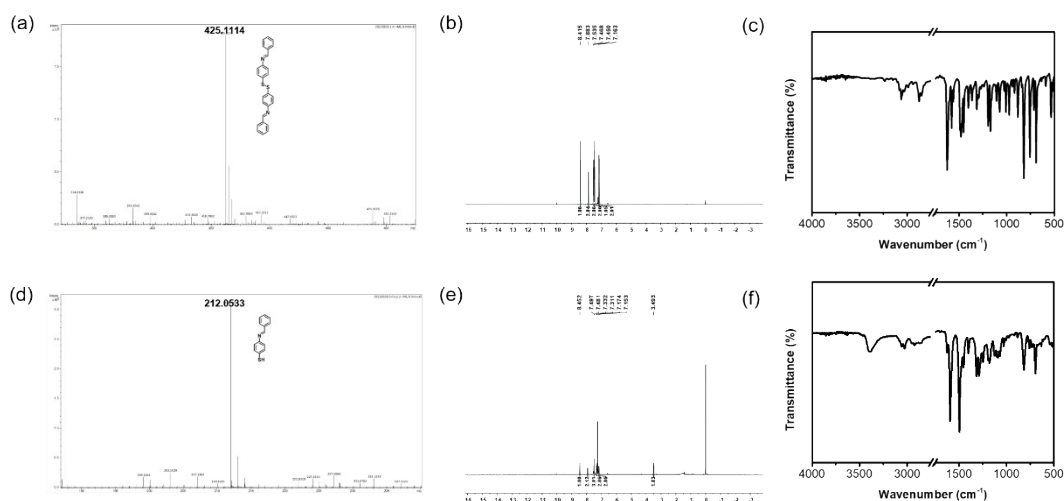

**Fig. S3** (a) MS spectrum of 4,4'-bis-benzylidene-amino-diphenyl-disulfide. (b) <sup>1</sup>H NMR spectrum of 4,4'-bis-benzylidene-amino-diphenyl-disulfide. (c) IR spectrum of 4,4'-bis-benzylidene-amino-diphenyl-disulfide. (d) MS spectrum of 4-benzaldaminobenzenethiol. (e) <sup>1</sup>H NMR spectrum of 4-benzaldaminobenzenethiol. (f) IR spectrum of 4-benzaldaminobenzenethiol.

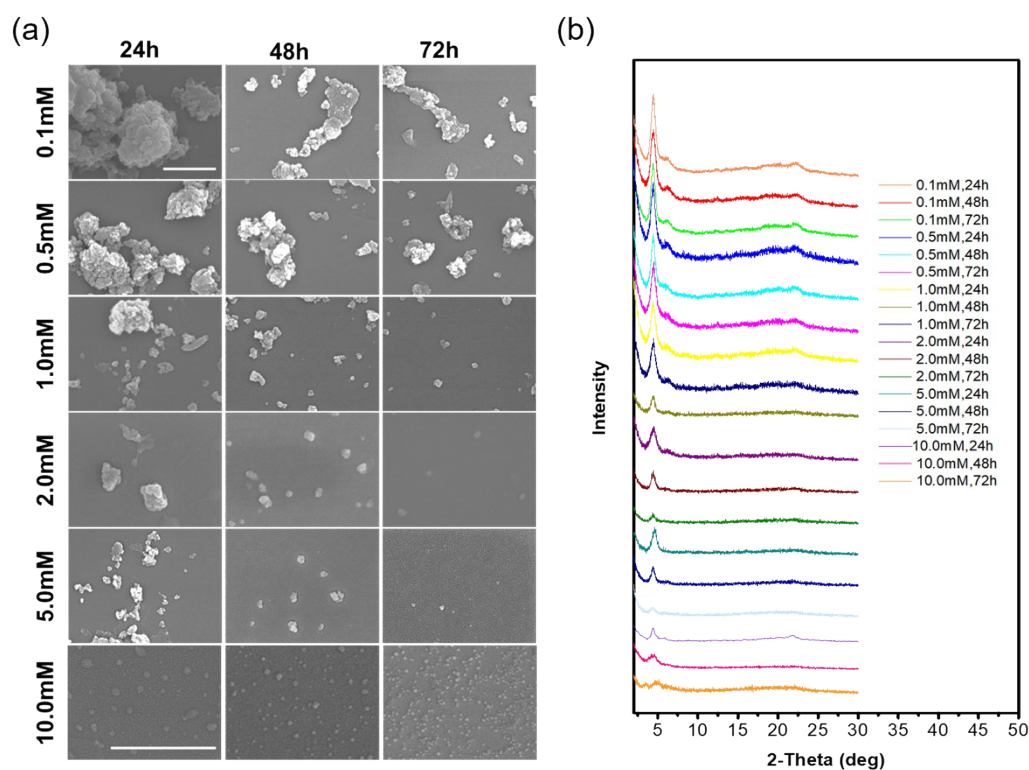

**Fig. S4** (a) SEM images for **DSPP-COF** with GSH in PBS at different concentrations and times. Scale bar, 1  $\mu$ m. The last three images share a scale bar with the 10 mM, 24 h image. (b) Corresponding PXRD patterns of **DSPP-COF** with GSH at different concentrations and times.

### 7. Synthesis of nano DSPP-COF

1 mg of **DCPP-COF** was dispersed into 10 mL of 10 mM glutathione PBS solution and stirred at 37  $^{\circ}$ C for 24 h. After filtration and removal of the residual GSH by washing, **nano DSPP-COF** was obtained.

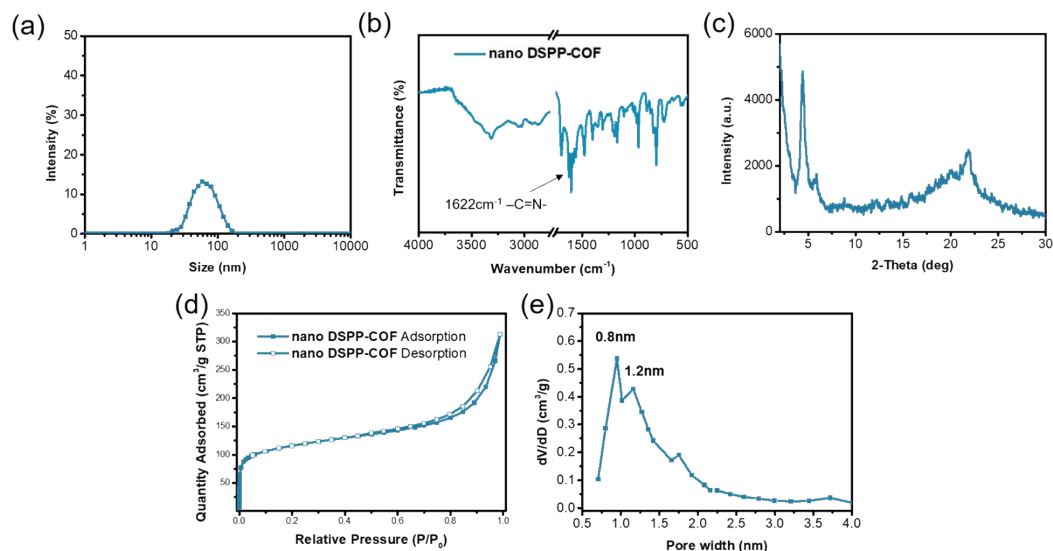

**Fig. S5** (a) Intensity (%) vs size distribution of **nano DSPP-COF**. (b) FT-IR spectra of **nano DSPP-COF**. The peaks at  $1622\text{ cm}^{-1}$  for  $-\text{C}=\text{N}$ . (c) PXRD pattern of **nano DSPP-COF**. (d)  $\text{N}_2$  adsorption (solid circle) and desorption (hollow circle) isotherms of **nano DSPP-COF**. BET surface area of **nano DSPP-COF** =  $424.3\text{ m}^2/\text{g}$ . (e) Pore size distributions of **nano DSPP-COF**. The pore size distribution curve based on nonlocal density functional theory (NLDFT) analysis, the pore width of **nano DSPP-COF** was centered at 0.8 and 1.2 nm.

### 8. Determination of sulfhydryl groups on nano DSPP-COF by Ellman's method

The Ellman reagent DTNB, i.e. 5,5'-dithiobis(2-nitrobenzoic acid), reacts with sulfhydryl groups to displace benzoic acid, i.e. TNB. DTNB has a characteristic absorption peak at 325 nm, while TNB shows a strong absorption peak at 412 nm under weakly basic conditions, and the sulfhydryl group concentration and absorbance values are in accordance with the Lambert-Beer law. The reaction of the sulfhydryl group with DTNB proceeded quantitatively, so the sulfhydryl group content in the sample could be determined by UV-Vis spectrophotometry.

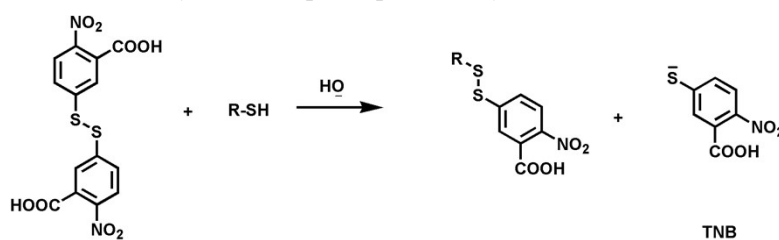

Ellman's reagent preparation: 2 mg of DTNB was dissolved in 2 mL of a buffer solution with pH 7.8.

Establishment of the standard curve: 4-Aminothiophenol was used as the sulfhydryl standard. 200  $\mu\text{L}$  of 4-Aminothiophenol was mixed with 200  $\mu\text{L}$  of Ellman's reagent and 1 mL of pH 7.8 buffer solution and incubated for 10 min at  $37\text{ }^\circ\text{C}$ . The absorbance at 412 nm was then measured using a multi-mode microplate detection system. Then the standard curve of concentration and absorbance was established.

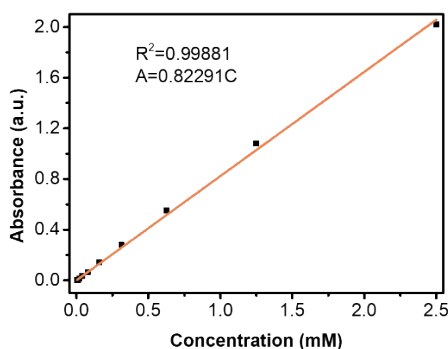

**Fig. S6** Standard curve of TNB at 412 nm based on UV-vis spectra absorbance.

Preparation of the dispersion to be measured: 10 mg of **nano DSPP-COF** was dispersed in 1 mL of ethanol to obtain a dispersion of 10 mg/mL concentration.

200  $\mu$ L of the above solution was mixed with 200  $\mu$ L of Ellman's reagent and 1 mL of buffer solution and incubated at 37  $^{\circ}$ C for 10 min. The reaction solution was then centrifuged at 13300 rpm for 10 min and the supernatant was filtered through an aperture of 0.22  $\mu$ m of microporous membrane filter. Then the absorbance at 412 nm was measured using a multi-mode microplate detection system.

### 9. Drug loading experiments

A mixture of **nano DSPP-COF** (5 mg) and 5-Fu (5 mg) in methanol (5 mL) was sonicated for 10 min. After being stirred (800 rpm) at 25  $^{\circ}$ C for 24 h, the resulting solids were separated by vacuum filtration and washed with water for 3 times. Finally, the obtained **5-Fu@nano DSPP-COF** was resuspended in water and stored at 4  $^{\circ}$ C until use.

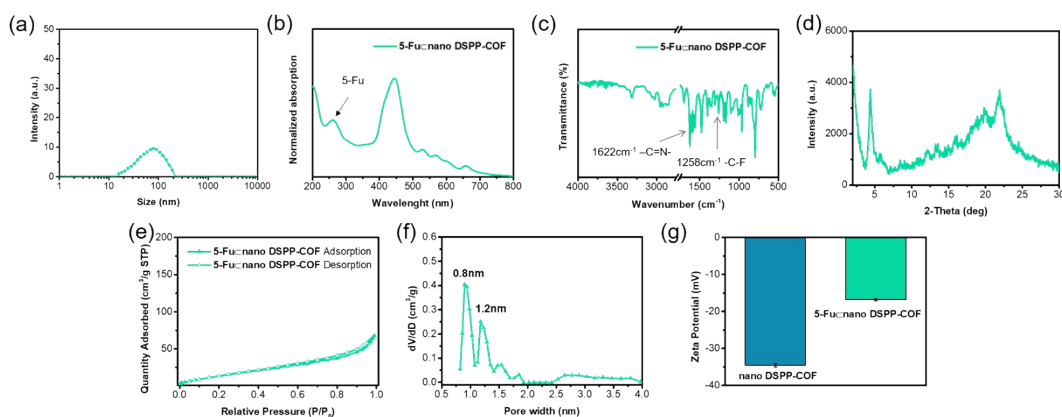

**Fig. S7** (a) Intensity (%) vs size distribution of **5-Fu@nano DSPP-COF**. (b) Ultraviolet-visible (UV-vis) absorption spectrum of **5-Fu@nano DSPP-COF**. A characteristic absorption band of 5-Fu at 258 nm was observed. (c) FT-IR spectrum of **5-Fu@nano DSPP-COF**. The C-F stretching vibration in 5-Fu was found at 1258  $\text{cm}^{-1}$ , and the  $\text{-C=N}$  stretching vibration was found at 1622  $\text{cm}^{-1}$ . (d) PXRD pattern of **5-Fu@nano DSPP-COF**. (e)  $\text{N}_2$  adsorption (solid circle) and desorption (hollow circle) isotherms of **5-Fu@nano DSPP-COF**. BET surface area of **5-Fu@nano DSPP-COF** is 61.6  $\text{m}^2/\text{g}$ . The specific surface area significantly decreased after 5-Fu loading. (f) Pore size distributions of **5-Fu@nano DSPP-COF**. The pore size distribution curve based on nonlocal density functional theory (NLDFT) analysis, the pore width of **5-Fu@nano DSPP-COF** was centered at 0.8 and 1.2 nm respectively. Compared with **nano DSPP-COF**, the ratio of 1.2 nm pore to 0.8 nm pore

is significantly reduced. (g) Zeta potentials of **nano DSPP-COF**, and **5-Fu****nano DSPP-COF**. The negative zeta potential of **nano DSPP-COF** is due to the presence of a large number of sulfhydryl groups on its surface. The COF nanocarrier possessed a negative surface charge regardless of the 5-Fu loading. The increased zeta potential of **5-Fu****nano DSPP-COF** may be due to a slight increase in particle size after drug loading. [1]

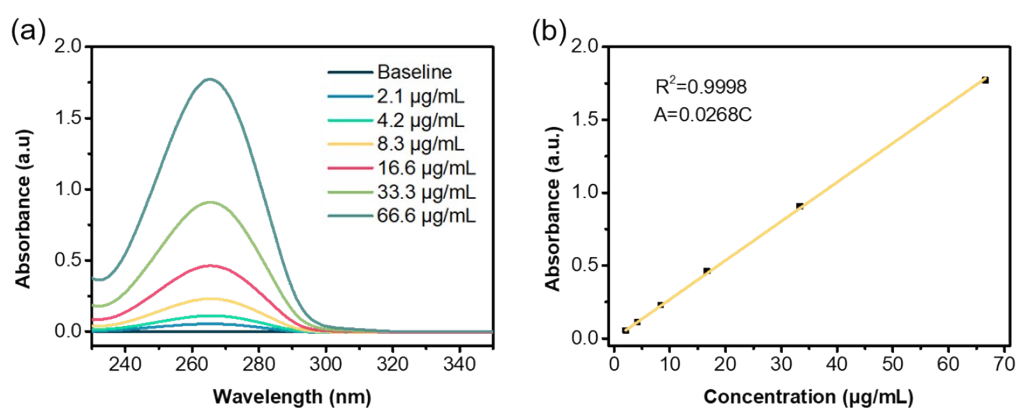

**Fig. S8** (a) Ultraviolet–visible (UV–vis) absorption spectrum of different concentrations of 5-Fu in PBS buffer solution. (b) Standard curve of 5-Fu based on absorption spectra. To avoid the interference of buffer solutions, in the measurement of the Ultraviolet–visible absorption spectrum of 5-Fu, the detector conversion wavelength was set to 370 nm and the collection wavelength was set to 230–350 nm before the measurement to reduce the effect of the detector conversion on the spectrum. Next, the baseline was scanned with PBS, and then measured the Ultraviolet–visible absorption spectrum of PBS at 230–350 nm, when the absorption spectrum of PBS was a smooth straight line, and then performed the later measurements, to ensure the accuracy of the results.

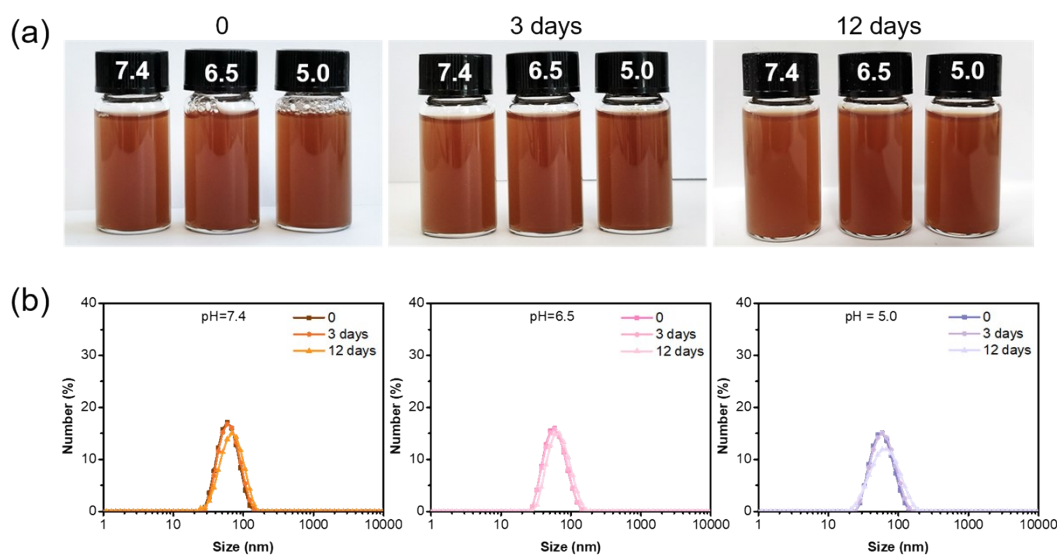

**Fig. S9** (a) Digital photos of **5-Fu****nano DSPP-COF** after 0, 3 and 12 days in PBS at different pH values (pH = 7.4, 6.5, 5.0). (b) Particle size profiles of **5-Fu****nano DSPP-COF** measured by DLS in PBS at different pH values (pH = 7.4, 6.5, 5.0) after 0, 3, and 12 days.

## 10. Drug Release Experiments

**5-Fu****nano DSPP-COF** (8 mg) was suspended in 8 mL PBS with or without GSH. The system was maintained at a magnetic stirring speed of 100 rpm. Every once in a while, 3 mL of the above

dispersion liquids were taken out and centrifugated immediately, and refilled with the same volume of fresh PBS, the solids obtained by centrifugation were also put back together. The amount of released 5-Fu was quantified by absorption spectrum and the accumulated drug release (ADR) of 5-Fu was calculated according to the following formula:

$$\text{ADR (wt \%)} = \left\{ \left( 8C_n + 3 \sum_{i=n}^{n-1} C_i \right) / \text{weight of loaded 5-Fu} \right\} \times 100\%$$

, where  $C_n$  is the concentration of 5-Fu in the supernatant at the time point of  $n$ .

To avoid the interference of the GSH solution, in the measurement of the Ultraviolet–visible absorption spectrum of 5-Fu, the detector conversion wavelength was set to 370 nm and the collection wavelength was set to 230-350 nm before the measurement to reduce the effect of detector conversion on the spectrum. Next, the baseline was scanned with GSH solution, and then measured the Ultraviolet–visible absorption spectrum of GSH solution at 230-350 nm, when the absorption spectrum of GSH solution was a smooth straight line, and then performed the later measurements, to ensure the accuracy of the results. Drug release experiments were performed three times under the same conditions.

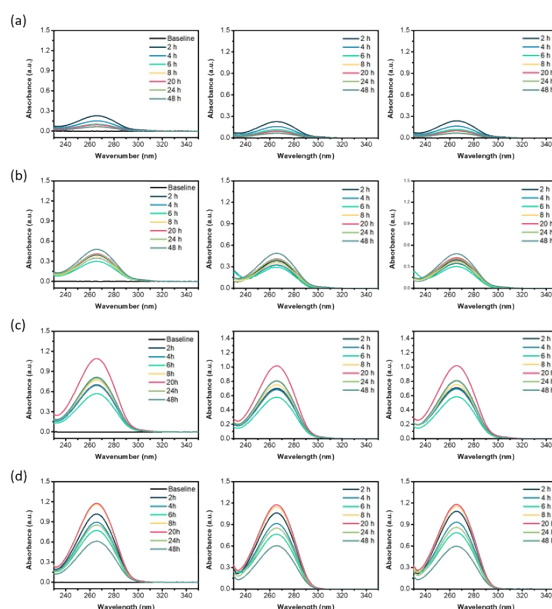

**Fig. S10** Ultraviolet–visible (UV–vis) absorption spectrum of drug release at different time points in different media. (a) In PBS buffer solution. (b) In PBS buffer solution containing 1 mM GSH. (c) In PBS buffered solution containing 5 mM GSH. (d) In PBS buffer solution containing 10 mM GSH. Each group of experiments was repeated three times.

### 11. ESR-Trapping Test

The acetone dispersion of **nano DSPP-COF** or **5-Fu****nano DSPP-COF** (200  $\mu$ L, 50  $\mu$ g/mL) and 10  $\mu$ L TEMP in a test tube was irradiated with a red LED (50 mW/cm<sup>2</sup>) for 60 s. Then, the resulting system was characterized using a Bruker EMX plus model spectrometer operating at the X-band frequency (9.4 GHz) at room temperature.

### 12. Photodynamic Property

A mixture of **nano DSPP-COF** or **5-Fu****nano DSPP-COF** (2 mL, 50  $\mu$ g/mL) and DPBF (200  $\mu$ L, 1 mM) in DMF in a quartz dish was irradiated with a red LED (50 mW/cm<sup>2</sup>) for 1 min. The absorbance of DPBF at 414 nm in the mixture was recorded at 10 s intervals. The <sup>1</sup>O<sub>2</sub> generation

rate was determined from the reduced absorbance over time. To characterize the difference in the rate of  $^1\text{O}_2$  introduced by different lasers, the ratios  $A/A_0$  of absorbance  $A$  and the initial absorbance  $A_0$  at 414 nm at different irradiation times were calculated and plotted as the ordinate for the irradiation time. The dispersion of **nano DSPP-COF** or **5-Fucnano DSPP-COF** (2 mL, 50  $\mu\text{g}/\text{mL}$ ) was used as the reference for this UV-vis measurement.

### 13. Cell Uptake and Subcellular Localization

To study the cell uptake, intracellular distribution, and subcellular localization, **nano DSPP-COF** was labelled with the fluorescent dye Bodipy-CHO. Briefly, **nano DSPP-COF-Bodipy** was prepared as follows: a mixture of **nano DSPP-COF** (1 mg), Bodipy-CHO (1 mg), and acetic acid (20  $\mu\text{L}$ , 6 M) in ethanol (2 mL) was stirred at 70  $^\circ\text{C}$  for 24 h in the dark. After fully washing with ethanol, the resulting solids were re-dispersed into DPBS (1 mL) to afford a stock solution of **nano DSPP-COF-Bodipy** (1 mg/mL). The structure of Bodipy-CHO and the schematic diagram of post-synthetic modifications are illustrated below:

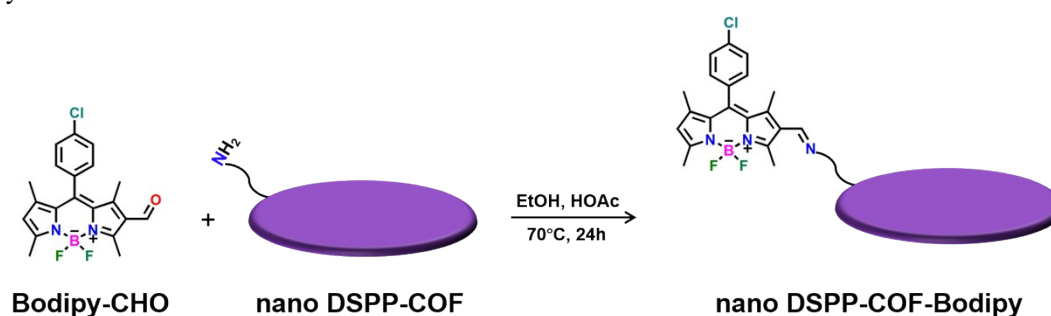

**Fig. S11** The structure of Bodipy-CHO and schematic diagram of post-synthetic modifications.

For subcellular localization, cells were incubated with **nano DSPP-COF-Bodipy** (200  $\mu\text{L}$ , 20  $\mu\text{g}/\text{mL}$ ) for 4 h in a  $\text{CO}_2$  incubator, and carefully washed with DPBS twice. After additional 4 h incubation, cells were incubated with MitoTracker Deep Red FM (200  $\mu\text{L}$ , 50 nM) for an additional 10 min, and washed with DPBS twice. Finally, the cells were washed with DPBS twice and the laser scanning confocal fluorescence images were captured. The images of **nano DSPP-COF-Bodipy** were excited by 488 nm light, and the emission wavelength range was collected at  $520 \pm 15$  nm. The images of MitoTracker Deep Red FM were excited by 633 nm light, and the emission wavelength range was collected at  $665 \pm 15$  nm. Controls were conducted as needed to make sure images were free of crosstalk. Colocalization was analyzed by ImageJ software.

### 14. Cellular Uptake Mechanism

MCF-7 Cells were subjected to different treatments before the incubation of **nano DSPP-COF-Bodipy** as follows: (i) DPBS,  $\text{CO}_2$  incubator, 1 h; (ii) HBSS, air atmosphere, 4  $^\circ\text{C}$ , 1 h; (iii) sodium dichloroacetate (DCA), 15 mM,  $\text{CO}_2$  incubator, 1 h; (iv) chlorpromazine (CPZ), 10  $\mu\text{g}/\text{mL}$ ,  $\text{CO}_2$  incubator, 1 h; (v) methyl- $\beta$ -cyclodextrin ( $\text{M}\beta\text{CD}$ ), 10 mg/mL,  $\text{CO}_2$  incubator, 1 h; (vi) amiloride (AMR), 37.5  $\mu\text{g}/\text{mL}$ ,  $\text{CO}_2$  incubator, 1 h. After these different treatments, the cells were incubated with DPBS dispersion of **nano DSPP-COF-Bodipy** (200  $\mu\text{L}$ , 20  $\mu\text{g}/\text{mL}$ ) in a  $\text{CO}_2$  incubator for 4 h, and washed with DPBS twice. The laser scanning confocal fluorescence images were captured. The green images of **nano DSPP-COF-Bodipy** were excited by 488 nm light, and the emission wavelength range was collected at  $520 \pm 15$  nm. The mean fluorescence intensity (MFI) was analyzed by ImageJ software.



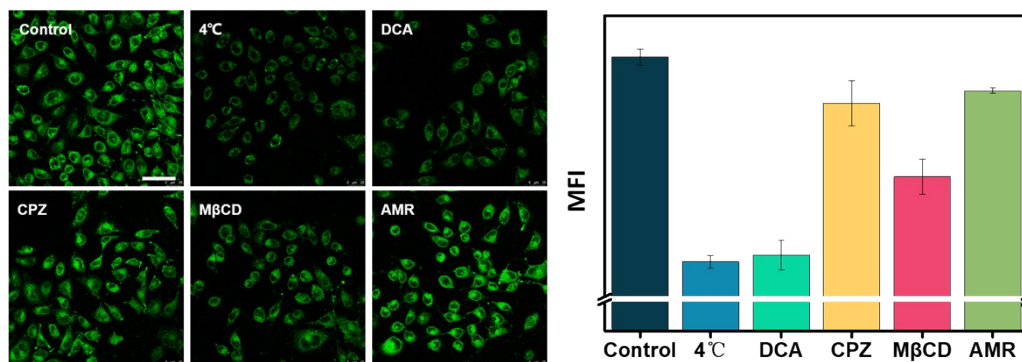

**Fig. S12** Cellular uptake mechanism of **nano DSPP-COF-Bodipy** in MCF-7 cells. The cells were treated with **nano DSPP-COF-Bodipy** (20  $\mu\text{g}/\text{mL}$ ) for 4 h, at 37  $^{\circ}\text{C}$ , 4  $^{\circ}\text{C}$  (energy generation suppression), and 37  $^{\circ}\text{C}$  while pre-treating with DCA (15 mM, inhibiting aerobic glycolysis through inhibiting pyruvate dehydrogenase kinase), CPZ (10  $\mu\text{g}/\text{mL}$ , clathrin-dependent endocytosis inhibitor), M $\beta$ CD (10 mg/mL, caveolin-dependent endocytosis inhibitor), and AMR (37.5  $\mu\text{g}/\text{mL}$ , micropinocytosis inhibitor) for 1 h. The cellular uptake was reflected by the MFI of green fluorescence. Data were presented as mean  $\pm$  SD ( $n = 4$ ). Scale bar, 50  $\mu\text{m}$ .

### 15. Intracellular GSH Measurements

The level of intracellular GSH was measured using a GSH assay kit based on the 5,5'-dithiobis(2-nitrobenzoic acid) (DTNB) colorimetric method. Experimentally, cells were seeded and cultured in 60 mm culture dishes for 24 h and treated with **nano DSPP-COF** (2.0 mL, 10  $\mu\text{g}/\text{mL}$ ) for 4 h in a  $\text{CO}_2$  incubator. After being rinsed with DPBS carefully, the cells were cultured for an additional 24, 48, or 72 h and taken for GSH measurements according to the manufacturer's guidelines of the assay kit. Colorimetric signals were measured by absorbance at 412 nm using a multi-mode microplate detection system. The GSH content was normalized to total protein amount of the cell lysates from a parallel plate and expressed as a percentage value relative to the control group value.

### 16. CCK-8 Cell Viability Assays

Standard CCK-8 assay was applied to evaluate the cell cytotoxicity of the nanodrugs. Experimentally,  $\sim 5000$  cells were cultured in 96-well plates for 24 h and treated with **nano DSPP-COF** or **5-Fu****nano DSPP-COF** (100  $\mu\text{L}$ , 0~20  $\mu\text{g}/\text{mL}$ ) for 4 h in a  $\text{CO}_2$  incubator. Then, the cells were washed with DPBS carefully. For PDT, the cells were exposed to red LED (50  $\text{mW}/\text{cm}^2$ , 8 min), and cultured for an additional 24 h. Subsequently, the CCK-8 solution (10  $\mu\text{L}$ ) was added to each well and the plate was incubated in a  $\text{CO}_2$  incubator for about 2 h. The absorbance at 450 nm was determined using a multi-mode microplate detection system.

For the selectivity of **5-Fu****nano DSPP-COF** on normal and cancer cells, cell viabilities of MCF-7 and MCF-10A cells were treated with **5-Fu****nano DSPP-COF** for 4 h and cultured for an additional 72 h. Subsequently, the CCK-8 solution (10  $\mu\text{L}$ ) was added to each well and the plate was incubated in a  $\text{CO}_2$  incubator for about 2 h. The absorbance at 450 nm was determined using a multi-mode microplate detection system.

For the toxicity of 5-Fu, we incubated the MCF-7 cells with the same concentration of 5-Fu as in **5-Fu****nano DSPP-COF** for 4 h and continued incubation for 24 h after the drug was removed. Subsequently, the CCK-8 solution (10  $\mu\text{L}$ ) was added to each well and the plate was incubated in a  $\text{CO}_2$  incubator for about 2 h. The absorbance at 450 nm was determined using a multi-mode microplate detection system.

In the CCK-8 cell viability assay, the cells without treatment were used as the control. The wells without cells were used as blanks. The cell viability was expressed as a percentage value relative to the control group value.

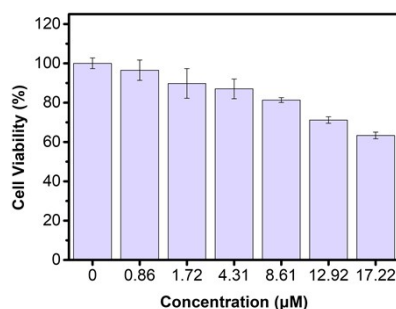

**Fig. S13** Cytotoxicity of MCF-7 with the same concentration of 5-Fu as in **5-Fu** nano DSPP-COF.

### 17. Calcein-AM/PI Double Staining

Cells were seeded into 60 mm culture dishes and incubated overnight in a CO<sub>2</sub> incubator. After removal of the culture medium, the cells were incubated with DPBS dispersion of **nano DSPP-COF** or **5-Fu** nano DSPP-COF (2 mL, 20 µg/mL) for 4 h in a CO<sub>2</sub> incubator. For PDT, the cells were exposed to red LED (50 mW/cm<sup>2</sup>, 8 min). For the Fer-1 addition group, MCF-7 cells were first pretreated with Fer-1 at a concentration of 20 µM for 1 h, followed by the same treatment as above. After additional 24 h incubation, cells were collected by centrifugation after digestion with trypsin solution, washed with DPBS twice carefully, and incubated with calcein-AM (500 µL, 2 µM) and PI (500 µL, 4 µM) for 15 min. Finally, the cells were washed with DPBS twice carefully, and imaged with a laser scanning confocal microscope. The green images of living cells were excited by 488 nm light, and the emission wavelength range was collected at 520 ± 20 nm. The red images of dead cells were excited by 514 nm light, and the emission wavelength range was collected at 640 ± 20 nm.

### 18. Intracellular Total ROS Measurements

Levels of intracellular ROS were measured by the cell-permeable dye DCFH-DA. Experimentally, cells were treated with **nano DSPP-COF** or **5-Fu** nano DSPP-COF (500 µL, 20 µg/mL) for 4 h in a CO<sub>2</sub> incubator. For the Fer-1 addition group, MCF-7 cells were first pretreated with Fer-1 at a concentration of 20 µM for 1 h, followed by the same treatment as above. And then the cells were washed with DPBS carefully. Afterward, the cells were loaded with DCFH-DA (200 µL, 100 nM) for 15 min in a CO<sub>2</sub> incubator and washed with DPBS twice. For PDT, the cells were exposed to red LED (50 mW/cm<sup>2</sup>, 8 min). Finally, the laser scanning confocal fluorescence images were captured. The green images were excited by a 488 nm light, and the emission wavelength range was collected at 525 ± 20 nm. Cells without any nanodrug treatment were used as a control group.

### 19. Cell Death Rescue Experiments

For the experiment on the effect of GSH-OEt on cell viability, cells were cultured in 96-well plates for 12 h. The cells were pretreated with GSH-OEt (100 µL, 1 mM) for 2 h, and then treated with **nano DSPP-COF** (100 µL, 0-20 µg/mL) or **5-Fu** nano DSPP-COF (100 µL, 0-20 µg/mL) for 4 h in a CO<sub>2</sub> incubator. For PDT, the cells were exposed to red LED (50 mW/cm<sup>2</sup>, 8 min). After additional 24 h incubation, the CCK-8 solution (10 µL) was added to each well and the plate was incubated in a CO<sub>2</sub> incubator for 2 h. The absorbance at 450 nm was determined using a multi-mode

microplate detection system.

For cell death rescue experiments, cells were cultured in 96-well plates for 12 h. The designated modulating compound including ferrostatin-1 (100  $\mu$ L, 0~20  $\mu$ M), liproxstatin-1 (100  $\mu$ L, 0~5  $\mu$ M), necrostatin-1 (100  $\mu$ L, 0~1000 nM), 3-MA (100  $\mu$ L, 0~100  $\mu$ M) were added to each well, pretreated the cells for two hours. And then treated with **nano DSPP-COF** (100  $\mu$ L, 20  $\mu$ g/mL) or **5-Fu $\subset$ nano DSPP-COF** (100  $\mu$ L, 10  $\mu$ g/mL) for 4 h in a CO<sub>2</sub> incubator. For PDT, the cells were exposed to red LED (50 mW/cm<sup>2</sup>, 8 min). After additional 24 h incubation, the CCK-8 solution (10  $\mu$ L) was added to each well and the plate was incubated in a CO<sub>2</sub> incubator for 2 h. The absorbance at 450 nm was determined using a multi-mode microplate detection system. The wells without cells were used as blanks.

The cells without treatment were used as the control. The cell viability was expressed as a percentage value relative to the control group value.

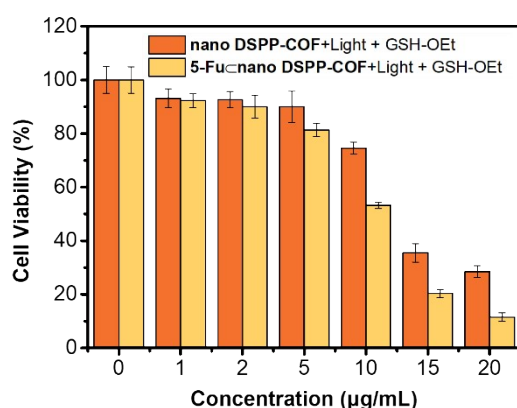

**Fig. S14** Phototoxicity of **nano DSPP-COF** and **5-Fu $\subset$ nano DSPP-COF** on MCF-7 cells in the presence of GSH-OE (100  $\mu$ L, 1.0 mM).

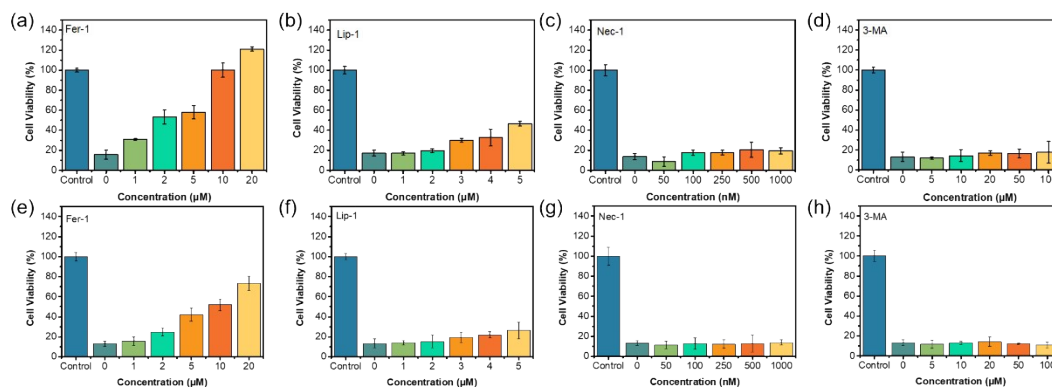

**Fig. S15** (a)-(d) Effects of different inhibitors on **nano DSPP-COF** + Light induced cell death in MCF-7 cells. (e)-(f) Effects of different inhibitors on **5-Fu $\subset$ nano DSPP-COF** induced cell death in MCF-7 cells. Ferrostatin-1 (100  $\mu$ L, 0~20  $\mu$ M), liproxstatin-1 (100  $\mu$ L, 0~5  $\mu$ M), necrostatin-1 (100  $\mu$ L, 0~1000 nM), 3-MA (100  $\mu$ L, 0~100  $\mu$ M).

## 20. Intracellular GPX4 Activity Measurements

Cells were seeded and cultured in 60 mm culture dishes for 24 h and treated with **nano DSPP-COF** or **5-Fu $\subset$ nano DSPP-COF** (2.0 mL, 20  $\mu$ g/mL) for 4 h in a CO<sub>2</sub> incubator. After carefully rinsed with DPBS. For PDT, the cells were exposed to a red LED (50 mW/cm<sup>2</sup>, 8 min). After that, the cells were cultured for an additional 24 h, and then quickly frozen in liquid nitrogen. Subsequently, the

frozen cells were homogenized in lysis buffer on ice and the supernatant was used for GPX4 activity measurements using a glutathione peroxidase assay kit. Colorimetric signals were measured by absorbance at 340 nm using a multi-mode microplate detection system. The GPX4 activity was normalized to the total protein amount of the cell lysates from a parallel plate and expressed as a percentage value relative to the control group value. Similarly, the expression of GPX4 in MCF-7 cells upon formulation treatment was also analyzed by western blotting. The cell lysates containing identical protein (40  $\mu\text{g}$ ) were subjected to standard electrophoresis, followed by antibody incubation at 4°C. The dilution ratio for the first antibody was 1:2000 (actin-specific antibody) and 1:2500 (GPX4-specific antibody). Regarding the secondary antibody, the dilution ratio was 1:5000 for both GPX4 and actin. The protein bands were developed via the ECL™ western blotting detection reagents.

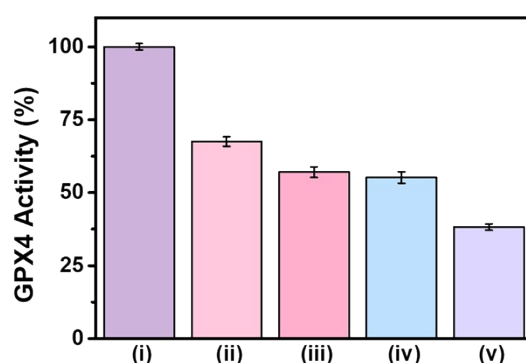

**Fig. S16** GPX4 activity of MCF-7 cells that were treated with **nano DSPP-COF** and **5-Fu nano DSPP-COF** with/without light. (i-v) in the figure represent (i) control, (ii) **nano DSPP-COF**, (iii) **5-Fu nano DSPP-COF**, (iv) **nano DSPP-COF + light**, (v) **5-Fu nano DSPP-COF + light**, respectively.

## 21. Intracellular Lipid Peroxidation Assays

Cells were treated with **nano DSPP-COF** or **5-Fu nano DSPP-COF** (500  $\mu\text{L}$ , 20  $\mu\text{g}/\text{mL}$ ) for 4 h in a  $\text{CO}_2$  incubator. For PDT, the cells were exposed to red LED (50  $\text{mW}/\text{cm}^2$ , 8 min). For the Fer-1 addition group, MCF-7 cells were first pretreated with Fer-1 at a concentration of 20  $\mu\text{M}$  for 1 h, followed by the same treatment as above. And then the cells were washed with DPBS carefully and cultured for an additional 4 h. After that, the cells were incubated with  $\text{C}_{11}$ -BODIPY (200  $\mu\text{L}$ , 2.0  $\mu\text{M}$ ) for 30 min in a  $\text{CO}_2$  incubator and washed with DPBS twice. Finally, the laser scanning confocal fluorescence images were captured. The green images of the oxidized  $\text{C}_{11}$ -BODIPY dye were excited by a 488 nm light, and the emission wavelength range was collected at  $510 \pm 20$  nm. The red images of the reduced  $\text{C}_{11}$ -BODIPY dye were excited by a 561 nm light, and the emission wavelength range was collected at  $591 \pm 20$  nm. Cells without any nanodrug treatment were used as a control group.

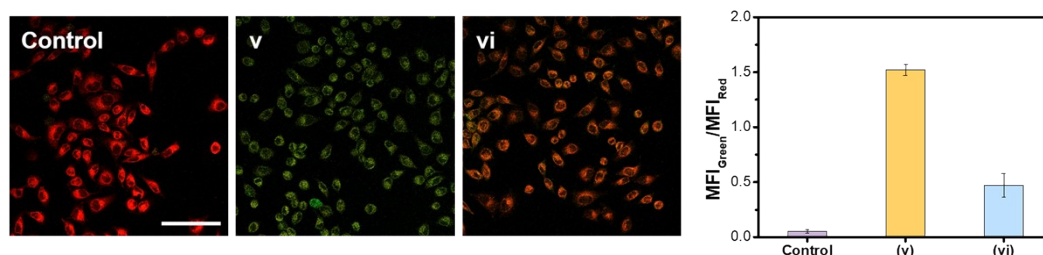

**Fig. S17** LCSM images of MCF-7 cells under different treatment conditions for the detection of

intracellular lipid peroxidation using C<sub>11</sub>-Bodipy. (v) **5-Fu** nano DSPP-COF + light, (vi) **5-Fu** nano DSPP-COF + light + Fer-1. Scale bar, 100  $\mu$ m.

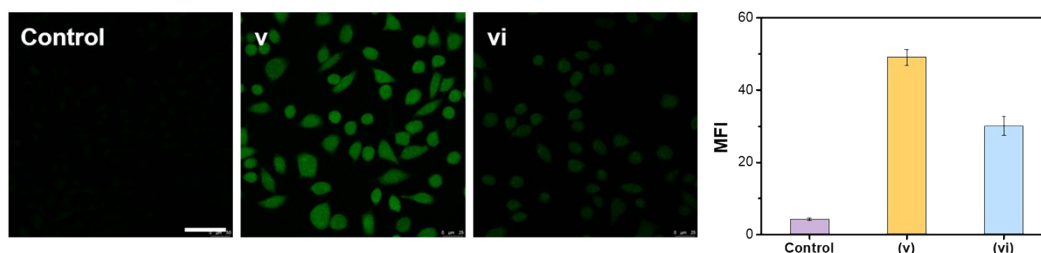

**Fig. S18** Detection of intracellular <sup>1</sup>O<sub>2</sub> using DCFH-DA. (v) **5-Fu** nano DSPP-COF + light, (vi) **5-Fu** nano DSPP-COF + light + Fer-1. Scale bar, 100  $\mu$ m.

## 22. Mitochondrial Membrane Potential Measurements

Mitochondrial membrane potential was measured by a fluorescent lipophilic carbocyanine dye JC-1. Experimentally, cells were treated with **nano DSPP-COF** or **5-Fu** nano DSPP-COF (500  $\mu$ L, 20  $\mu$ g/mL) for 4 h in a CO<sub>2</sub> incubator. And then the cells were washed with DPBS carefully. For the Fer-1 addition group, MCF-7 cells were first pretreated with Fer-1 at a concentration of 20  $\mu$ M for 1 h, followed by the same treatment as above. For PDT, the cells were exposed to red LED (50 mW/cm<sup>2</sup>, 8 min). After additional 4 h incubation, the cells were incubated with JC-1 (200  $\mu$ L, 15  $\mu$ M) for 10 min in a CO<sub>2</sub> incubator and washed with DPBS twice. Finally, the laser scanning confocal fluorescence images were captured. The green images of monomer were excited by 488 nm light, and the emission wavelength range was collected at 530  $\pm$  15 nm. The red images of J-aggregate were excited by 561 nm light, and the emission wavelength range was collected at 590  $\pm$  17 nm. Cells without any nanodrug treatment were used as a control group.

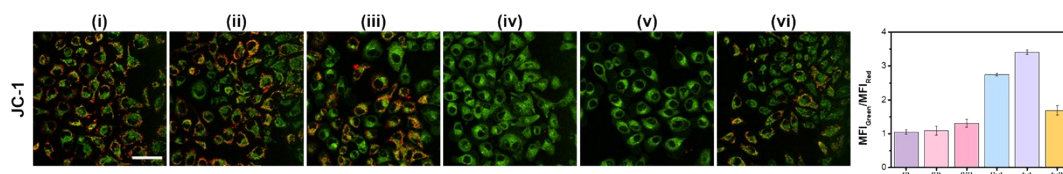

**Fig. S19** Laser scanning confocal fluorescence microscopy images of JC-1 staining for determining mitochondrial membrane potential. (i-v) in the figure represent (i) control, (ii) **nano DSPP-COF**, (iii) **5-Fu** nano DSPP-COF, (iv) **nano DSPP-COF** + light, (v) **5-Fu** nano DSPP-COF + light, (vi) **5-Fu** nano DSPP-COF + light + Fer-1, respectively. Scale bar, 50  $\mu$ m.

## 23. Lysosomal Membrane Permeabilization Detections

Lysosomal membrane permeabilization was measured by a lysosomotropic metachromatic fluorochrome AO. Experimentally, cells were treated with various **nano DSPP-COF** or **5-Fu** nano DSPP-COF (500  $\mu$ L, 20  $\mu$ g/mL) for 4 h in a CO<sub>2</sub> incubator. And then the cells were washed with DPBS carefully. For the Fer-1 addition group, MCF-7 cells were first pretreated with Fer-1 at a concentration of 20  $\mu$ M for 1 h, followed by the same treatment as above. For PDT, the cells were exposed to red LED (50 mW/cm<sup>2</sup>, 8 min). After additional 4 h incubation, the cells were incubated with AO (200  $\mu$ L, 15  $\mu$ M) for 10 min in a CO<sub>2</sub> incubator and washed with DPBS twice. Finally, the laser scanning confocal fluorescence images were captured. The green images of deprotonated AO were excited by 488 nm light, and the emission wavelength range was collected at 530  $\pm$  20 nm. The red images of protonated AO were excited by 488 nm light, and the emission wavelength range was collected at 640  $\pm$  20 nm. Cells without any nanodrug treatment were used as a control group.

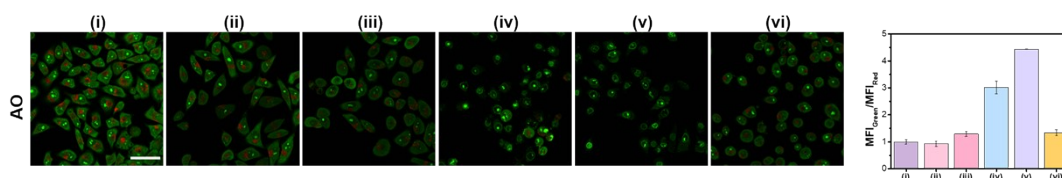

**Fig. S20** Laser scanning confocal fluorescence microscopy images of AO staining for determining lysosomal membrane permeabilization. Scale bar, 50  $\mu\text{m}$ . (i-v) in the figure represent (i) control, (ii) nano DSPP-COF, (iii) 5-Fu $\zeta$ nano DSPP-COF, (iv) nano DSPP-COF + light, (v) 5-Fu $\zeta$ nano DSPP-COF + light, (vi) 5-Fu $\zeta$ nano DSPP-COF + light + Fer-1, respectively. Scale bar, 50  $\mu\text{m}$ .

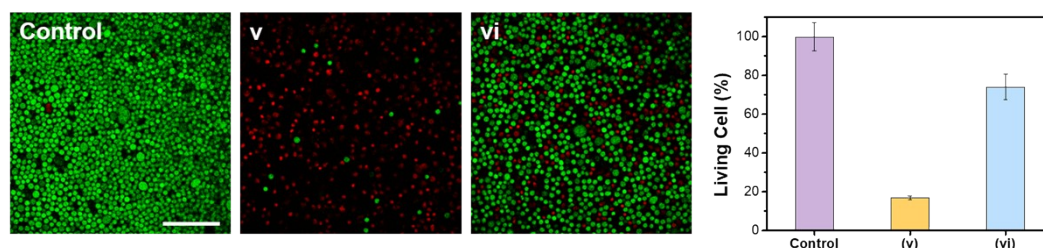

**Fig. S21** Calcein-AM/PI double staining. (v) 5-Fu $\zeta$ nano DSPP-COF + light, (vi) 5-Fu $\zeta$ nano DSPP-COF + light + Fer-1. Scale bar, 200  $\mu\text{m}$ .

#### 24. Hemolysis Analysis

First, fresh nude mouse blood samples (2 mL) were added to PBS solution (4 mL), and red blood cells (RBC) were separated by centrifugation at 3000 rpm for 10 minutes. After washing 5 times with PBS, dilute purified red blood cells to 20 mL with PBS. For hemolysis assay, 0.2 mL of diluted RBCs suspension was added to 1.0 mL of PBS as a negative control and 1.0 mL of deionized water as a positive control. And 1.0 mL 5-Fu $\zeta$ nano DSPP-COF suspension at a concentration range of 1 to 200  $\mu\text{g/mL}$ . All mixtures were then allowed to stand at 37  $^{\circ}\text{C}$  for 5 h and then centrifuged at 13300 rpm for 10 minutes. Due to the small size of 5-Fu $\zeta$ nano DSPP-COF, it was difficult to separate 5-Fu $\zeta$ nano DSPP-COF completely even by centrifugation at 13300 rpm for 10 minutes. Therefore, we chose the supernatant of the corresponding concentration as a control. The absorbance of 541 nm supernatant was measured by synergy SpectraMax i3x multi-mode microplate reader. The hemolytic percentage of red blood cells was calculated by the following formula: Hemolysis Rate =  $[(D_t - D_{cc}) / (D_{pc} - D_{nc})] \times 100\%$ .

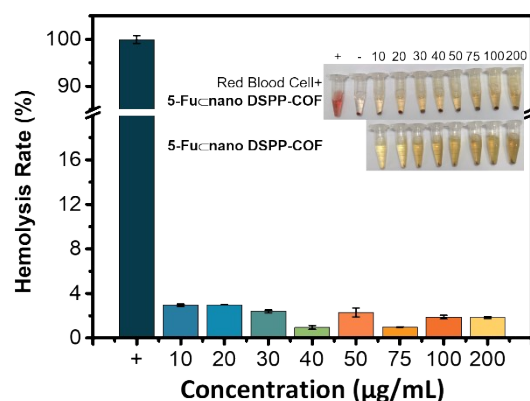

**Fig. S22** Hemolytic assay using red blood cells incubated with control solvents and different concentrations of 5-Fu $\zeta$ nano DSPP-COF.

## 25. In vivo biodistribution

To study *in vivo* biodistribution, **nano DSPP-COF** was labelled with the fluorescent dye Cy5-NH<sub>2</sub>. Briefly, **nano DSPP-COF-Cy5** was prepared as follows: a mixture of **nano DSPP-COF** (1.0 mg), Cy5-NH<sub>2</sub> (1.0 mg), and acetic acid (20  $\mu$ L, 6.0 M) in ethanol (2.0 mL) was stirred at 70 °C for 24 h in the dark. After fully washing with ethanol, the resulting solids were re-dispersed into DPBS (1.0 mL) to afford a stock solution of **nano DSPP-COF-Cy5** (1.0 mg/mL). **5-Fu****nano DSPP-COF-Cy5** was prepared by the same method as that used to prepare **5-Fu****nano DSPP-COF**, and the resulting solids were re-dispersed into DPBS (1.0 mL) to afford a stock solution of **5-Fu****nano DSPP-COF-Cy5** (1.0 mg/mL).

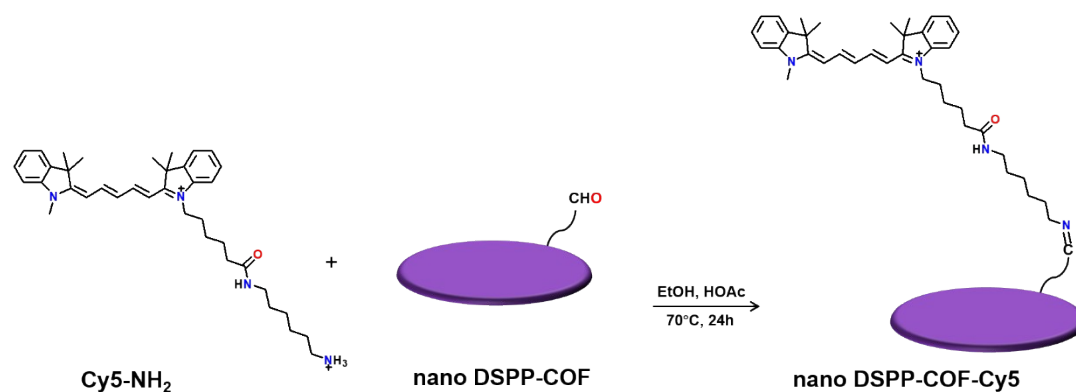

**Fig. S23** The structure of Cy5-NH<sub>2</sub> and schematic diagram of post-synthetic modifications.

To evaluate the biodistribution of **5-Fu****nano DSPP-COF-Cy5** (50  $\mu$ L, 1 mg/mL) was intratumorally injected. Then, nude mice with MCF-7 tumors were anesthetized and imaged at different times (4 h, 8 h, 12 h, 24 h, and 0-12 days) using an *in vivo* imaging system with an excitation wavelength of 640 nm and an emission wavelength of 680 nm. Then, the mice were killed and organs and tumors were separated for *ex vivo* imaging to determine the biodistribution pattern and retention of **5-Fu****nano DSPP-COF-Cy5** in the tumors. It is important to note that nude mice have to be fed with non-fluorescent chow for 24 hours before imaging.

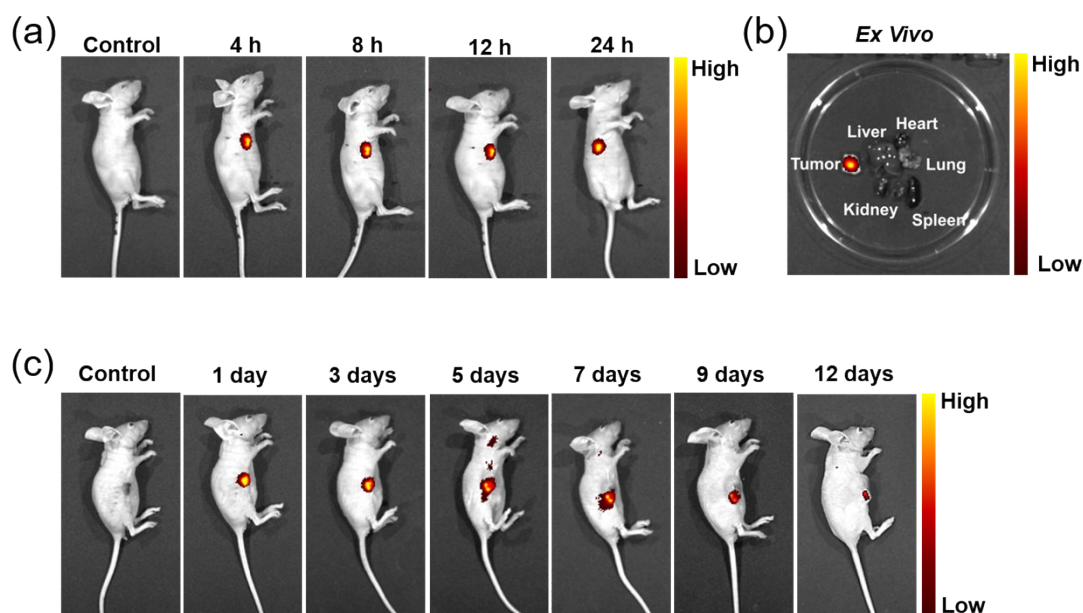

**Fig. S24** *In vivo* and *ex vivo* imaging experiments. (a) Whole-body fluorescence images of MCF-7

tumor-bearing mice intratumorally injected with **5-Fu** nano DSPP-COF-Cy5 at different time points. (b) *Ex vivo* fluorescence imaging of each organ at 24 h. (c) Long-term whole-body fluorescence imaging assay in nude mice. ‘Low’ represents a fluorescence intensity of  $9 \times 10^6$ , and ‘High’ represents a fluorescence intensity of  $2.2 \times 10^7$ .

## 26. In Vivo Antitumor Therapy

MCF-7 cancer cells ( $10^6$  cells) suspended in DPBS (100  $\mu$ L) were subcutaneously injected into the flanks of each nude mice to establish the MCF-7 xenograft model. The length (L) and width (W) of the tumor were determined by digital calipers. The tumor volume (V) was calculated by the formula  $V = 1/2 \times L \times W^2$ . When the tumor size reached  $\sim 100$  mm<sup>3</sup>, the nude mice bearing MCF-7 tumors ( $n = 30$ ) were randomly distributed into six groups, i.e., (i) control, (ii) **nano DSPP-COF**, (iii) **5-Fu** nano DSPP-COF, (iv) **nano DSPP-COF** + light, (v) **5-Fu** nano DSPP-COF + light, and (vi) **5-Fu** nano DSPP-COF + light + Fer-1 groups. After intratumoral injection PBS (100  $\mu$ L), **nano DSPP-COF** or **5-Fu** nano DSPP-COF (50  $\mu$ L, 1 mg mL<sup>-1</sup>), the nude mice were fed for 4 h, and for the treatment group, light treatment (660 nm laser, 100 mW cm<sup>-2</sup>, 8 min) was performed on the tumor site. For **5-Fu** nano DSPP-COF + light + Fer-1 groups, after injection **5-Fu** nano DSPP-COF, Fer-1 (5.0 mg/kg) was injected. The mice continued to be fed for 12 days. The tumor volume and nude mouse body weight were recorded every other day during the experimental period.

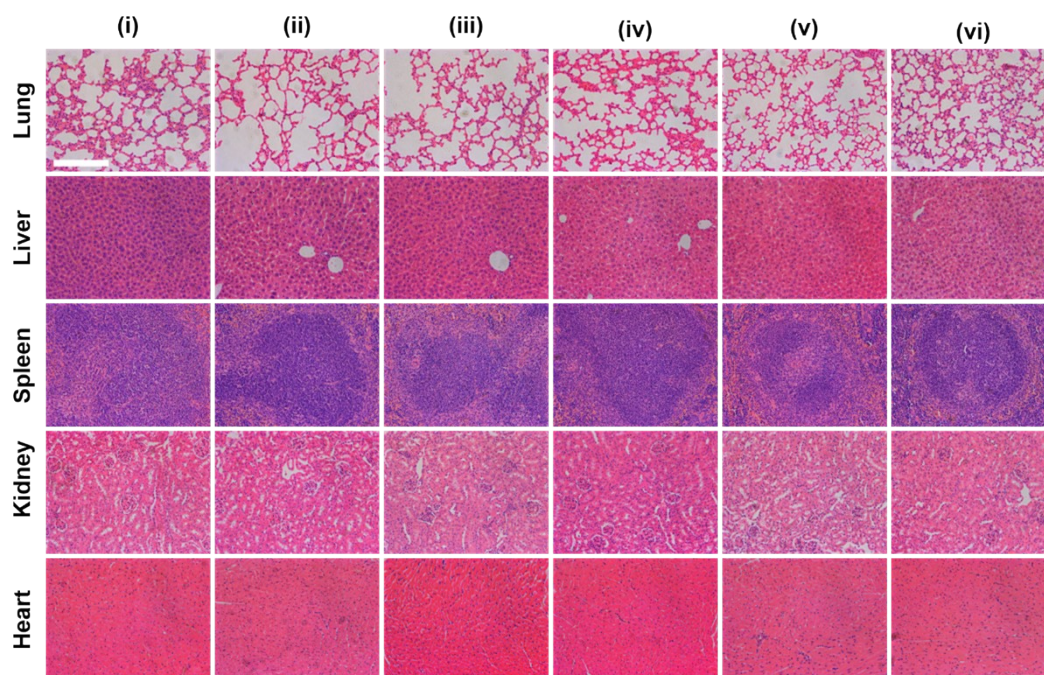

**Fig. S25** H&E stained tissue sections from the lung, liver, spleen, kidney, and heart, of the nude mice at the end of the treatment. Scale bar, 200  $\mu$ m. (i-v) in the figure represent (i) control, (ii) **nano DSPP-COF**, (iii) **5-Fu** nano DSPP-COF, (iv) **nano DSPP-COF** + light, (v) **5-Fu** nano DSPP-COF + light, (vi) **5-Fu** nano DSPP-COF + light + Fer-1, respectively.



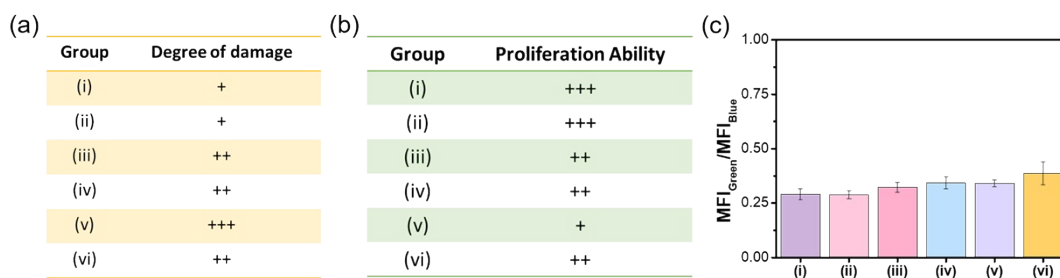

**Fig. S26** (a) Evaluation of the degree of tumor tissue damage derived from H&E. In which, +++ indicates severe damage, ++ indicates slight damage, and + indicates almost no damage. (b) Evaluation of tumor proliferative ability derived from Ki67. Where, +++ indicates strong proliferative ability, ++ indicates medium proliferative ability, and + indicates weak proliferative ability. (c)  $MFI_{Green}/MFI_{Blue}$  of tunel.

## 27. Supplemental References

- [1] (a) T. G. a. J. B. Talbot, *J. Electrochem. Soc.*, 2006, **153**, G622-G625. (b) N. Yeole, D. Hundiwale, *Colloids and Surfaces A: Physicochem. Eng. Aspects*, 2011, **392**, 329-334.
